# Supplementary material
Source: PubMed Central journal article supplement (PMC4336343)
Supplement: JB.02546-14_zjb999093523so1.pdf [file JB.02546-14_zjb999093523so1.pdf]

## **Biosynthesis of Cell Envelope-Associated Phenolic Glycolipids in *Mycobacterium marinum***

Olivia Vergnolle,<sup>a\*</sup> Sivagami Sundaram Chavadi,<sup>a\*</sup> Uthamaphani R. Edupuganti,<sup>a</sup>  
Poornima Mohandas,<sup>a,b</sup> Catherine Chan,<sup>a</sup> Julie Zeng,<sup>a</sup> Mykhailo Kopylov,<sup>a\*</sup> Nicholas G.  
Angelo,<sup>c</sup> J. David Warren,<sup>c</sup> Clifford E. Soll,<sup>d</sup> and Luis E. N. Quadri<sup>a,b</sup>

Department of Biology, Brooklyn College, City University of New York, Brooklyn, New  
York, USA<sup>a</sup>; Graduate Center, City University of New York, New York, New York, USA<sup>b</sup>;  
Department of Biochemistry and Milstein Chemistry Core Facility, Weill Cornell Medical  
College, New York, New York, USA<sup>c</sup>; Department of Chemistry, Hunter College, City  
University of New York, New York, New York, USA<sup>d</sup>.

Address correspondence to Luis E. N. Quadri, [LQuadri@brooklyn.cuny.edu](mailto:LQuadri@brooklyn.cuny.edu).

O.V. and S.C. contributed equally to this work.

\* Present address: O.V. and S.C., Albert Einstein College of Medicine, Bronx, New York,  
USA; M.K., Florida State University, Tallahassee, Florida, USA.

This paper is dedicated to the memory of our wonderful colleague, Dr. Clifford E. Soll,  
who recently passed away.

## Supplemental Material

- Table S1. Strains
  - Table S2. Plasmids
  - Table S3. Mutant screening/verification: primer/amplicon information
  - Table S4. Mutagenesis & expression constructs: primer/amplicon information
  - Figure S1. p2NIL-GOALc-based mutagenesis-cassette delivery vectors
  - Figure S2. Mutant verification analysis
  - Figure S3. SDS-PAGE of purified PpsA and FadD29 proteins
  - Large-scale synthesis of s-PHPA and supporting NMR spectra
  - References
-

**TABLE S1. Bacterial strains**

| <b>Strain</b>                                | <b>Characteristics</b>                                                                                                                                                | <b>Source or Reference</b>       |
|----------------------------------------------|-----------------------------------------------------------------------------------------------------------------------------------------------------------------------|----------------------------------|
| <i>E. coli</i> DH5 $\alpha$                  | Cloning host                                                                                                                                                          | Invitrogen                       |
| <i>E. coli</i> BAP1                          | Recombinant protein expression host; contains a genome-integrated copy of <i>sfp</i> , encoding the phosphopantetheinyl transferase Sfp from <i>Bacillus subtilis</i> | (1, 2)                           |
| <i>E. coli</i> BL21(DE3)                     | Recombinant protein expression host                                                                                                                                   | Stratagene                       |
| <i>M. marinum</i> strain M                   | Wild-type                                                                                                                                                             | American Type Culture Collection |
| <i>M. marinum</i> $\Delta$ <i>fadD22</i>     | Carries an in-frame, unmarked <i>fadD22</i> deletion                                                                                                                  | This study                       |
| <i>M. marinum</i> $\Delta$ <i>fadD26</i>     | Carries an in-frame, unmarked <i>fadD26</i> deletion                                                                                                                  | This study                       |
| <i>M. marinum</i> $\Delta$ <i>fadD28</i>     | Carries an in-frame, unmarked <i>fadD28</i> deletion                                                                                                                  | This study                       |
| <i>M. marinum</i> $\Delta$ <i>fadD29</i>     | Carries an in-frame, unmarked <i>fadD29</i> deletion                                                                                                                  | This study                       |
| <i>M. marinum</i> <i>ppsA</i> <sub>S-A</sub> | Carries a <i>ppsA</i> mutated allele with a Ser-to-Ala substitution disrupting the phosphopantetheine attachment site of the ACP <sub>L</sub> domain                  | This study                       |

**TABLE S2. Plasmids**

| <b>Plasmid</b>                      | <b>Characteristics</b>                                                  | <b>Source or Reference</b> |
|-------------------------------------|-------------------------------------------------------------------------|----------------------------|
| pCR2.1-TOPO                         | Cloning vector, kanamycin and ampicillin resistance                     | Invitrogen                 |
| p2NIL                               | Vector with kanamycin resistance gene and OriE                          | (3)                        |
| pGOAL19                             | Vector with <i>sacB-lacZ Pacl</i> cassette, hygromycin resistance, OriE | (3)                        |
| p2NILGOALc- $\Delta$ <i>fadD22c</i> | <i>fadD22</i> deletion cassette delivery vector                         | This study                 |
| p2NILGOALc- $\Delta$ <i>fadD26c</i> | <i>fadD26</i> deletion cassette delivery vector                         | This study                 |
| p2NILGOALc- $\Delta$ <i>fadD28c</i> | <i>fadD28</i> deletion cassette delivery vector                         | This study                 |
| p2NILGOALc- $\Delta$ <i>fadD29c</i> | <i>fadD29</i> deletion cassette delivery vector                         | This study                 |
| p2NILGOALc- <i>ppsAc</i>            | <i>ppsA</i> mutagenesis cassette delivery vector                        | This study                 |
| pCP0                                | Mycobacterial expression vector, kanamycin resistance                   | (4)                        |
| pCP0-FadD22                         | pCP0 derivative expressing FadD22                                       | This study                 |
| pCP0-FadD26                         | pCP0 derivative expressing FadD26                                       | This study                 |
| pCP0-FadD28                         | pCP0 derivative expressing FadD28                                       | This study                 |
| pCP0-FadD29                         | pCP0 derivative expressing FadD29                                       | This study                 |
| pCP0-PpsA                           | pCP0 derivative expressing PpsA                                         | This study                 |
| pCOLADuet-1                         | <i>E. coli</i> expression vector, kanamycin resistance                  | Novagen                    |
| pCOLADuet-FadD29                    | pCOLADuet-1 derivative expressing His <sub>6</sub> -FadD29              | This study                 |
| pETDuet-1                           | <i>E. coli</i> expression vector, ampicillin resistance                 | Novagen                    |
| pETDuet-PpsA                        | pETDuet-1 derivative expressing His <sub>6</sub> -PpsA                  | This study                 |

**TABLE S3. PCR primer pairs and amplicon information used in mutant screening and verification**

| Mutant         | Primer name        | Primer sequence<br>(5'-3')                | Amplicon (bp) |                  |
|----------------|--------------------|-------------------------------------------|---------------|------------------|
|                |                    |                                           | Mutant strain | Wild-type strain |
| <i>ΔfadD22</i> | SallFadD22OF       | GTCGACTCACCATCGTGGAGTTCGCCAGCTGG          | 2,016         | 4,110            |
|                | NotIFadD22OR       | GCGGCCGCACGCGCTGGGCGAGCCCATT              |               |                  |
|                | HindIIIFadD22For   | AAGCTTGCTAGGGCGGTCATCCAATAATGC            | 0             | 2,156            |
|                | HpaIFadD22Rev      | GTTAACCTCAGTTGCTCCTGTTTCATGATTC           |               |                  |
| <i>ΔfadD26</i> | HindIIIMarFadD26OF | AAGCTTATGAAGAATTTTCGAGTGGGAGTCCTGCCGACATT | 1,930         | 3,658            |
|                | KpnIMarFadD26OR    | GGTACCTCCGCGAAACACCGCCGGAGACAACAGCAAATT   |               |                  |
|                | pCP0ForMarFadD26   | GAATTCAATGGGAGTGTAGTGCGATGCCGG            | 0             | 1,794            |
|                | pCP0RevMarFadD26   | AAGCTTATGCTCGGTGTCATACCGTCACGT            |               |                  |

**TABLE S3. Continuation**

|                            |                    |                                         |                           |                         |
|----------------------------|--------------------|-----------------------------------------|---------------------------|-------------------------|
| <i>ΔfadD28</i>             | BamHIMarFadD28OF   | GGATCCACCCGCTTCACCTCTTCGAGGAAACTGGAAA   | 1,928                     | 3,639                   |
|                            | NotIMarFadD28OR    | GCGGCCGCTTCGGGCCAGCAGTAGCGGGGCGGTGAGTAT |                           |                         |
|                            | pCP0ForMarFadD28   | AAGCTTCGGTAACGTGATGCCCATGAGTGT          | 0                         | 1,779                   |
|                            | pCP0RevMarFadD28   | GCTAGCTTGACACGCTAGACGTCCAGGCGG          |                           |                         |
| <i>ΔfadD29</i>             | HindIIIMarFadD29OF | AAGCTTACCACGGTCTGAGGTATCTGCTGGTGATCAAT  | 1,966                     | 3,804                   |
|                            | PmlIMarFadD29OR    | CACGTGAAAACCTGCACCAGCTCCGGCGAATCCGGCATA |                           |                         |
|                            | pCP0ForMarFadD29   | GAATTCTCTTCCGTCGAGAGCAAGGATGAT          | 0                         | 1,919                   |
|                            | pCP0RevMarFadD29   | AAGCTTTAAAGCCGCCAACATGCCGTCATG          |                           |                         |
| <i>ΔppsA<sub>S-A</sub></i> | ppsAACPMutOF       | AAGCTTCGCTCCCTTCAACCTCAGCCCCGCTGCG      | 1,832                     | 1,832                   |
|                            | ppsAACPMutOR       | CCGGCACCTTCACCACGGACGAAACCGTCTG         | (split by<br>BssHII)      | (no split by<br>BssHII) |
|                            | pm7                | CGATCGAGGACTTGCGGTCACAG                 | 526                       | 526                     |
|                            | pm8                | GGTGGCCGACGTCGTGCTGGTAC                 | (Ser-to-Ala<br>mutations) | (wild-type<br>sequence) |

**TABLE S4. Primers and amplicons pertaining to construction of mutagenesis cassettes & expression plasmids**

| <b>Amplicon (bp)</b>                   | <b>Primer name</b> | <b>Primer sequence (5'-3')</b>               | <b>Comments</b>                                       |
|----------------------------------------|--------------------|----------------------------------------------|-------------------------------------------------------|
| <i>ΔfadD22c</i> 5' arm<br>(1,025)      | SallFadD22OF       | GTCGACTCACCATCGTGGAGTTCGCCAGCTGG             | Full-length cloned into p2NIL as a Sall-NotI fragment |
|                                        | FadD22IR           | TCCTGTTCATGATTCCC GCATTATTGGATGACCG<br>CCCTA |                                                       |
| <i>ΔfadD22c</i> 3' arm<br>(1,018)      | FadD22IF           | ATCCAATAATGCGGGAATCATGAACAGGAGCAA<br>CTGAG   |                                                       |
|                                        | NotIFadD22OR       | GCGGCCGCACGCGCTGGGCGAGCCCATT                 |                                                       |
| <i>ΔfadD22c</i> full-length<br>(2,016) | SallFadD22OF       | GTCGACTCACCATCGTGGAGTTCGCCAGCTGG             |                                                       |
|                                        | NotIFadD22OR       | GCGGCCGCACGCGCTGGGCGAGCCCATT                 |                                                       |

**TABLE S4. Continuation**

|                                        |                    |                                                     |                                                                   |
|----------------------------------------|--------------------|-----------------------------------------------------|-------------------------------------------------------------------|
| <i>ΔfadD26c</i> 5' arm<br>(1,029)      | HindIIIMarFadD26OF | AAGCTTATGAAGAATTTTCGAGTGGGAGTCCTGC<br>CGACATT       | Full-length cloned<br>into p2NIL as a<br>HindIII-KpnI<br>fragment |
|                                        | FadD26IR           | TCATACCGTCACGTCCGGTCACCGGCATCGCACT<br>ACACTCCCATTCC |                                                                   |
| <i>ΔfadD26c</i> 3' arm<br>(958)        | FadD26IF           | ATGCCGGTGACCGACGTGACGGTATGACACCGA<br>GCATCCGGTG     |                                                                   |
|                                        | KpnIMarFadD26OR    | GGTACCTCCGCGAAACACCGCCGGAGACAACAG<br>CAAATT         |                                                                   |
| <i>ΔfadD26c</i> full-length<br>(1,952) | HindIIIMarFadD26OF | AAGCTTATGAAGAATTTTCGAGTGGGAGTCCTGC<br>CGACATT       |                                                                   |
|                                        | KpnIMarFadD26OR    | GGTACCTCCGCGAAACACCGCCGGAGACAACAG<br>CAAATT         |                                                                   |



**TABLE S4. Continuation**

|                                        |                  |                                                   |                                                                 |
|----------------------------------------|------------------|---------------------------------------------------|-----------------------------------------------------------------|
| <i>ΔfadD28c</i> 5' arm<br>(983)        | BamHIMarFadD28OF | GGATCCACCCGCTTCACCTCTTCGAGGAAA<br>GGAAA           | Full-length cloned<br>into p2NIL as a<br>BamHI-NotI<br>fragment |
|                                        | FadD28IR         | CTAGACGTCCAGGCGGGGGAACGCACACTCATG<br>GGCATCACGTTA |                                                                 |
| <i>ΔfadD28c</i> 3' arm<br>(972)        | FadD28IF         | ATGAGTGTGCGTTCCCCCGCCTGGACGTCTAGC<br>GTGTCAACCGAC |                                                                 |
|                                        | NotIMarFadD28OR  | GCGGCCGCTTCGGGCCAGCAGTAGCGGGGCGG<br>TGAGTAT       |                                                                 |
| <i>ΔfadD28c</i> full-length<br>(1,922) | BamHIMarFadD28OF | GGATCCACCCGCTTCACCTCTTCGAGGAAA<br>GGAAA           |                                                                 |
|                                        | NotIMarFadD28OR  | GCGGCCGCTTCGGGCCAGCAGTAGCGGGGCGG<br>TGAGTAT       |                                                                 |

**TABLE S4. Continuation**

|                                        |                    |                                                    |                                                                   |
|----------------------------------------|--------------------|----------------------------------------------------|-------------------------------------------------------------------|
| <i>ΔfadD29c</i> 5' arm<br>(982)        | HindIIIMarFadD29OF | AAGCTTACCACGGTCTGAGGTATCTGCTGGTGA<br>TCAAT         | Full-length cloned<br>into p2NIL as a<br>HindIII-PmlI<br>fragment |
|                                        | MarFadD29IR        | ATGCGGACCGGTCCAAAGTCCATGATCATCCTT<br>GCTCTCGACGGAA |                                                                   |
| <i>ΔfadD29c</i> 3' arm<br>(1,015)      | MarFadD29IF        | AGGATGATCATGGACATTTGGACCGGTCCGCAT<br>GACGGCATGTT   |                                                                   |
|                                        | PmlIMarFadD29OR    | CACGTGAAAACCTGCACCAGCTCCGGCGAATCC<br>GGCATA        |                                                                   |
| <i>ΔfadD29c</i> full-length<br>(1,966) | HindIIIMarFadD29OF | AAGCTTACCACGGTCTGAGGTATCTGCTGGTGA<br>TCAAT         |                                                                   |
|                                        | PmlIMarFadD29OR    | CACGTGAAAACCTGCACCAGCTCCGGCGAATCC<br>GGCATA        |                                                                   |

**TABLE S4. Continuation**

|                                   |                  |                                          |                                                           |
|-----------------------------------|------------------|------------------------------------------|-----------------------------------------------------------|
| <i>ΔppsAc</i> 5' arm (950)        | ppsAACPMutOF     | AAGCTTCGCTCCCTTCAACCTCAGCCCCGCTGC<br>G   | Full-length cloned into p2NIL as a as HindIII-HpaI insert |
|                                   | ppsAACPMutIR     | AGCACAACGGCGTCGCGCGCGGCCACGCCGAG<br>GTCA |                                                           |
| <i>ΔppsAc</i> 3' arm (912)        | ppsAACPMutIF     | TGACCTCGGCGTGGCCGCGCGCGACGCCGTTG<br>TGCT |                                                           |
|                                   | ppsAACPMutOR     | CCGGCACCTTCACCACGGACGAAACCGTCG           |                                                           |
| <i>ΔppsAc</i> full-length (1,832) | ppsAACPMutOF     | AAGCTTCGCTCCCTTCAACCTCAGCCCCGCTGC<br>G   |                                                           |
|                                   | ppsAACPMutOR     | CCGGCACCTTCACCACGGACGAAACCGTCG           |                                                           |
| RBS- <i>fadD22</i> (2,156)        | HindIIIFadD22For | AAGCTTGCTAGGGCGGTCATCCAATAATGC           | Cloned into pCP0 as a HindIII-HpaI insert                 |
|                                   | HpaIFadD22Rev    | GTTAACCTCAGTTGCTCCTGTTCATGATTC           |                                                           |

**TABLE S4. Continuation**

|                            |                  |                                                                     |                                             |
|----------------------------|------------------|---------------------------------------------------------------------|---------------------------------------------|
| RBS- <i>fadD26</i> (1,794) | pCP0ForMarFadD26 | GAATTCAATGGGAGTGTAGTGCGATGCCGG                                      | Cloned into pCP0 as an EcoRI-HindIII insert |
|                            | pCP0RevMarFadD26 | AAGCTTATGCTCGGTGTCATACCGTCACGT                                      |                                             |
| RBS- <i>fadD28</i> (1,779) | pCP0ForMarFadD28 | AAGCTTCGGTAACGTGATGCCCATGAGTGT                                      | Cloned into pCP0 as a NheI-HindIII insert   |
|                            | pCP0RevMarFadD28 | GCTAGCTTGACACGCTAGACGTCCAGGCGG                                      |                                             |
| RBS- <i>fadD29</i> (1,919) | pCP0ForMarFadD29 | GAATTCTCTTCCGTGAGAGCAAGGATGAT                                       | Cloned into pCP0 as an EcoRI-HindIII insert |
|                            | pCP0RevMarFadD29 | AAGCTTTAAAGCCGCCAACATGCCGTCATG                                      |                                             |
| RBS- <i>ppsA</i> (4,853)   | pm25             | GCCAGTTAACATTCAATCGGAGGAAAGTGACGG<br>TATGACACCGAGCATCGGTGGAGAAGCCGA | Cloned into pCP0 as a HpaI-NheI insert      |
|                            | pm26             | GATGGCTAGCTTACCCAGGGCCCTCCGGGAGCA<br>GTGAA                          |                                             |

**TABLE S4. Continuation**

|                         |                |                                    |                                               |
|-------------------------|----------------|------------------------------------|-----------------------------------------------|
| <i>fadD29</i> (1,881)   | MarfadD29NTFor | GAATTCTATCATGGACACCAACGCCGTTTCG    | Cloned into pCOLADuet as an EcoRI-NotI insert |
|                         | MarfadD29NTRev | GCGGCCGCTCATGCGGACCGGTCCAAACGGGT   |                                               |
| <i>ppsA</i> NT1 (2,100) | MarppsANT1For  | GGATCCTACACCGAGCATCGGTGGAGAAGC     | NT1+NT2+NT3 cloned (multistep) into pETDuet   |
|                         | MarppsANT1Rev  | GGCGCGCCGAGCTGCATGCCGATCAGACCTAGCT |                                               |
| <i>ppsA</i> NT2 (2,000) | MarppsANT2For  | GCCGA ACTGGAACCGGTATTCCTGGCCGAA    |                                               |
|                         | MarppsANT2Rev  | GCCGCTGGTGGCGGTGTAGTGGGCGAGCCA     |                                               |
| <i>ppsA</i> NT3 (809)   | MarppsANT3For  | GTGCGCGCCATGTTTGCACCCAAACTCGAC     |                                               |
|                         | MarppsANT3Rev  | AAGCTTTTACCCAGGGCCCTCCGGGAGCAG     |                                               |

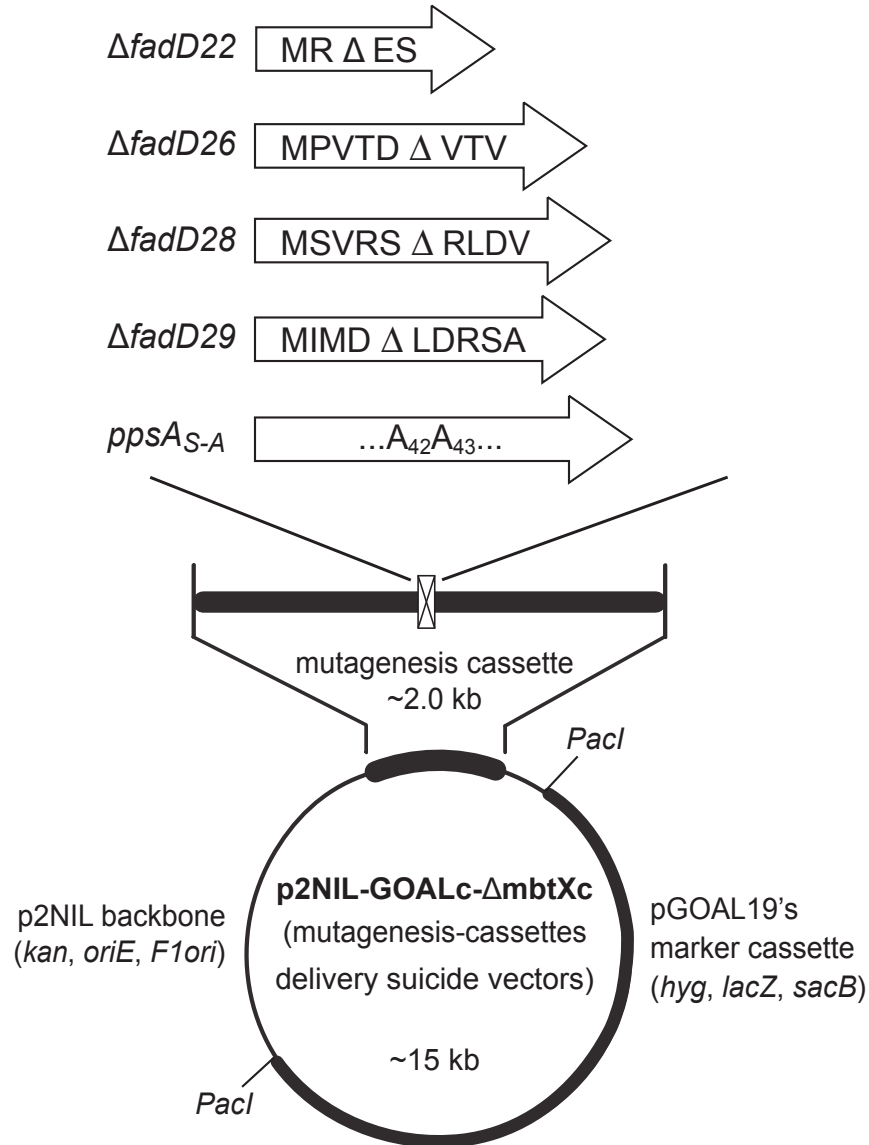

**Fig. S1. Mutagenesis cassette-delivery suicide vectors used for construction of *M. marinum* mutants.** The predicted translational products of the gene remnants or the amino acid substitutions in the mutagenesis cassette-delivery vectors are shown. The deletion/mutation point is flanked by *ca.* 1.0 kb of downstream and upstream wild-type sequence for homologous recombination with the chromosome.

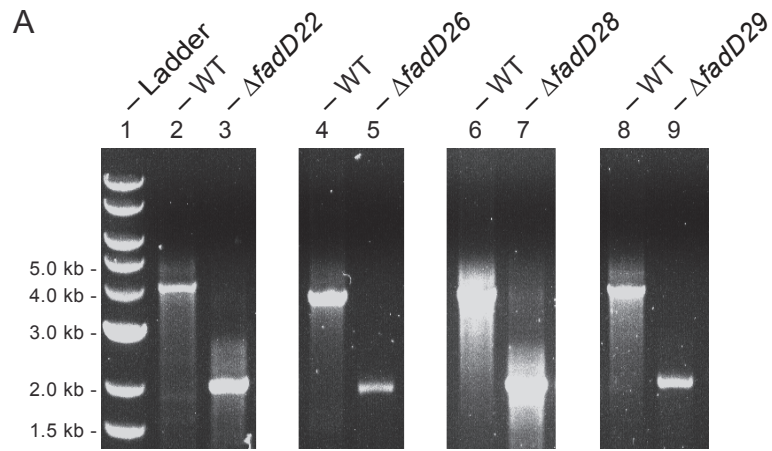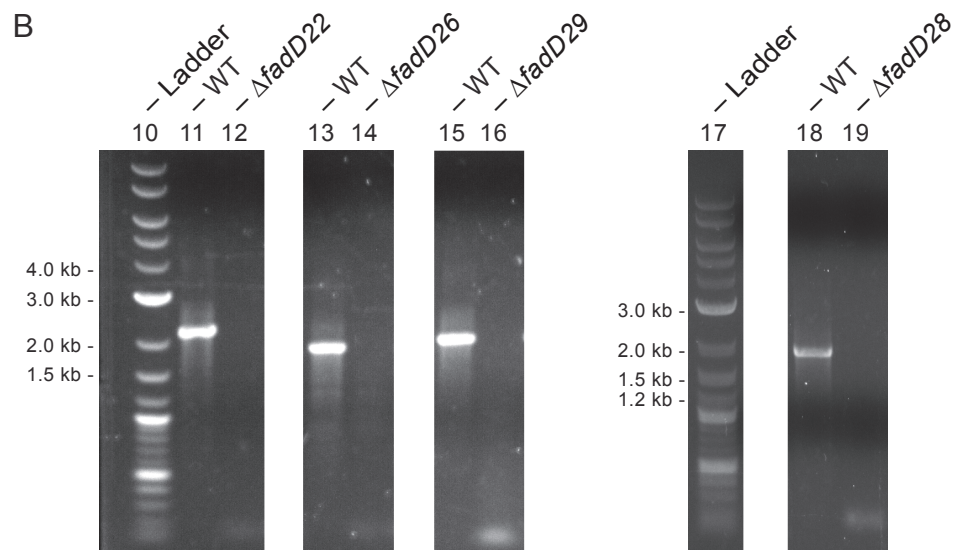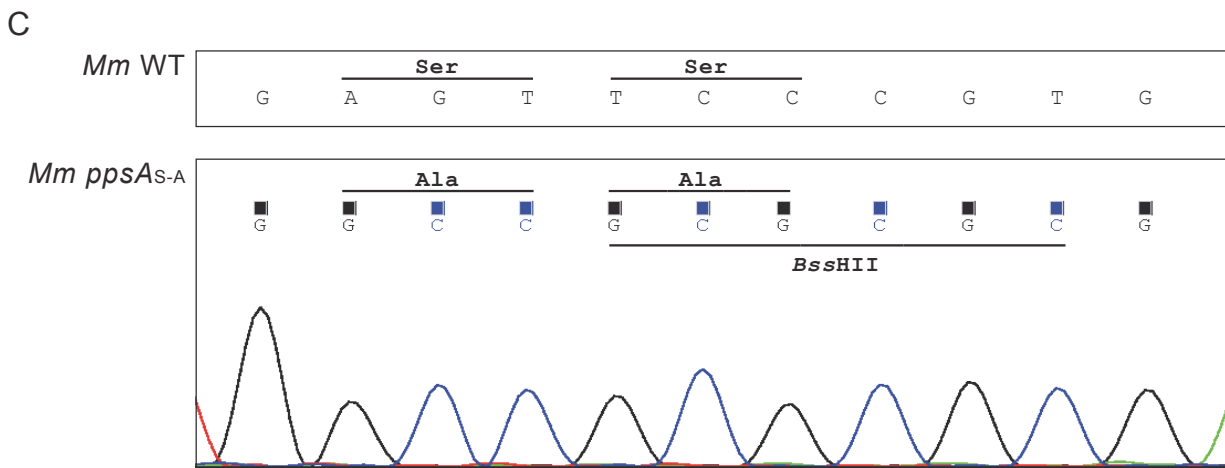

**Fig. S2. Mutant verification analysis.** Each chromosomal deletion was confirmed by PCR using two independent primer pairs. One primer pair was used to verify the expected ~2-kb deletion at the deletion site (A). A second primer pair was used to confirm the elimination of the target gene from the chromosome (B). The nucleotide substitutions in *Mm ppsA<sub>S-A</sub>* introducing Ser-to-Ala substitutions and a BssHII restriction site were confirmed by sequence analysis (C). Amplicon information for the agarose gel electrophoresis image shown in panel A: lane 2, *Mm* WT (4,110-bp amplicon expected with primers SallFadD22OF and NotIFadD22OR); lane 3, *Mm ΔfadD22* (2,016-bp amplicon expected with SallFadD22OF and NotIFadD22OR); lane 4, *Mm* WT (3,658-bp amplicon expected with primers HindIIIMarFadD26OF and KpnIMarFadD26OR); lane 5, *Mm ΔfadD26* (1,930-bp amplicon expected with HindIIIMarFadD26OF and KpnIMarFadD26OR); lane 6, *Mm* WT (3,639-bp amplicon expected with primers BamHIMarFadD28OF and NotIMarFadD28OR); lane 7, *Mm ΔfadD28* (1,928-bp amplicon expected with BamHIMarFadD28OF and NotIMarFadD28OR); lane 8, *Mm* WT (3,804-bp amplicon expected with primers BamHIMarFadD28OF and NotIMarFadD28OR); lane 9, *Mm ΔfadD29* (1,966-bp amplicon expected with HindIIIMarFadD29OF and PmlIMarFadD29OR). Amplicon information for the agarose gel electrophoresis image shown in panel B: lane 11, *Mm* WT, 2,156-bp amplicon expected with primers HindIIIFadD22For and HpaIFadD22Rev; lane 12, *Mm ΔfadD22*, no amplicon expected with HindIIIFadD22For and HpaIFadD22Rev; lane 13, *Mm* WT, 1,794-bp amplicon expected with primers pCP0ForMarFadD26 and pCP0RevMarFadD26; lane 14, *Mm ΔfadD26*, no amplicon expected with pCP0ForMarFadD26 and pCP0RevMarFadD26; lane 15, *Mm* WT, 1,919-bp amplicon expected with primers pCP0ForMarFadD29 and pCP0RevMarFadD29; lane 16, *Mm ΔfadD29*, no amplicon expected with pCP0ForMarFadD29 and pCP0RevMarFadD29; lane 18, *Mm* WT, 1,779-bp amplicon expected with primers pCP0ForMarFadD28 and pCP0RevMarFadD28; lane 19, *Mm ΔfadD28*, no amplicon expected with pCP0ForMarFadD28 and pCP0RevMarFadD28. DNA ladder marker: lanes 1, 10, and 17. The sizes of relevant DNA makers flanking the PCR product of interests are indicated. WT, wild-type. *Mm*, *M. marinum*. See Table S3 for primer information.



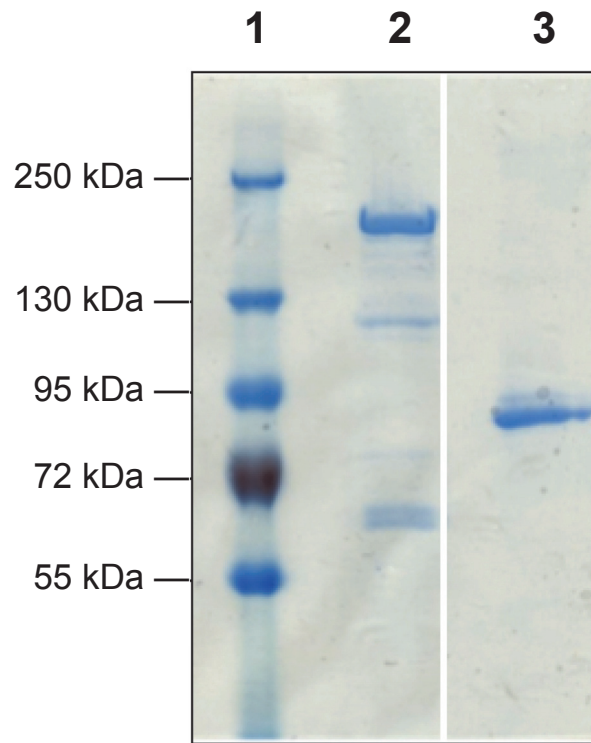

**Fig. S3. Recombinant PpsA (lane 2) and FadD29 (lane 3) proteins.** Protein samples were resolved by SDS-PAGE and stained with GelCode Blue Stain (Pierce). The positions of molecular weight markers (lane 1) are indicated.

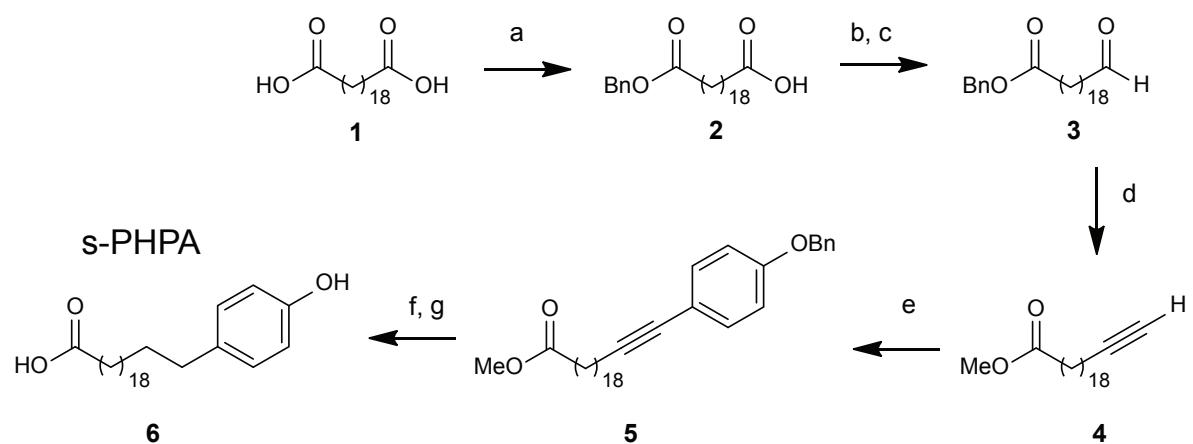

**Fig. S4. s-PHPA synthesis outline.** Conditions: (a) tetrabutylammonium fluoride, benzyl bromide (44%); (b)  $\text{BH}_3$ ·dimethylsulfide (99%); (c) oxalyl chloride, dimethylsulfoxide, triethylamine; (d) dimethyl (1-diazo-2-oxopropyl)phosphonate,  $\text{K}_2\text{CO}_3$  (88%, 2 steps); (e) 1-(benzyloxy)-4-iodobenzene,  $\text{PdCl}_2(\text{PPh}_3)_2$ ,  $\text{CuI}$ , triethylamine (73%); (f)  $\text{LiOH}$  (95%); (g) Palladium/activated Carbon (10 mol %),  $\text{H}_2$  (98%).

## **Synthesis of s-PHPA**

### **1) General experimental procedures**

Unless otherwise stated, all commercially available materials were purchased from Aldrich, TCI America, or Alfa Aesar and used without any subsequent purification. When necessary, solvents and reagents were dried prior to use, using standard protocols. All non-aqueous reactions were carried out in oven-dried glassware under an atmosphere of Argon. Flash column chromatography was conducted following the protocol reported by Still and co-workers (5), using ICN Silted 32–63 D 60 Å silica gel. Analytical thin layer chromatography (TLC) was performed employing Merck 250 micron 60F-254 silica plates. The plates were visualized either by exposure to UV light, staining with iodine impregnated silica gel, or by staining with ceric ammonium molybdate (CAM). Mass spectra were recorded on a Waters Micromass SQD spectrometer by electrospray (ESI) ionization in negative ionization mode.  $^1\text{H}$  and  $^{13}\text{C}$  NMR spectra were acquired on a Bruker DRX-500 spectrometer at 500 MHz for  $^1\text{H}$  and 125 MHz for  $^{13}\text{C}$ . Chemical shifts are expressed in parts per million downfield from tetramethylsilane (TMS), using either TMS or the solvent resonance as an internal standard (TMS,  $^1\text{H}$ : 0 ppm; chloroform,  $^{13}\text{C}$ : 77.0 ppm; MeOH- $d_4$ ,  $^1\text{H}$ : 3.31 ppm;  $^{13}\text{C}$ : 49.0 ppm). Data are reported as follows: chemical shift, multiplicity (s = singlet, d = doublet, t = triplet, q = quartet, m = multiplet, br = broad), integration, and coupling constant. Supporting NMR spectra are presented below, after Experimental Procedures.

## 2) Experimental Procedures

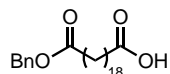

**20-(Benzyloxy)-20-oxoicosanoic acid (2).** To a 35°C solution of icosanedioic acid (**1**, 10 g, 29.2 mmol) in tetrahydrofuran (THF) (400 ml) was added tetrabutylammonium fluoride (TBAF) (1.0 M in THF, 29.2 ml, 29.2 mmol) dropwise (**6**). The resulting mixture stirred for 30 min at which point a solution of benzyl bromide (3.47 ml, 29.2 mmol) in THF (50 ml) was added via addition funnel over 3 h. Upon complete addition, the reaction stirred an additional 14 h at 35 °C, was cooled to rt and slowly diluted with aqueous HCl (1 M, 400 ml), then extracted with ethyl acetate (EtOAc) (4 × 100 ml). The combined organic layers were washed with aqueous HCl, dried over MgSO<sub>4</sub> and concentrated *in vacuo* to provide the crude product as a white powder. Purification by flash chromatography (0–10% EtOAc in dichloromethane (DCM)) yielded the title compound as a white, powdery solid (5.51 g, 44%). <sup>1</sup>H NMR (CDCl<sub>3</sub>): δ 7.40–7.28 (m, 5H), 5.11 (s, 2H), 2.35 (t, *J* = 7.6 Hz, 2H), 2.34 (t, *J* = 7.5 Hz, 2H), 1.67–1.59 (m, 4H), 1.36–1.22 (brm, 28H); <sup>13</sup>C NMR (CDCl<sub>3</sub>): δ 179.6, 173.9, 136.3, 128.7, 128.3, 66.2, 34.5, 34.1, 29.8, 29.8, 29.7, 29.6, 29.4, 29.3, 29.2, 25.1, 24.8.

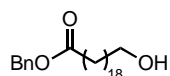

**Benzyl 20-hydroxyicosanoate.** To a stirred 0°C solution of 20-(benzyloxy)-20-oxoicosanoic acid (**2**, 5.51 g, 12.7 mmol) in THF (200 ml) was added borane dimethyl sulfide complex (1.8 ml, 1.45 g, 19.1 mmol). The reaction was slowly warmed to ambient temperature over the course of 90 min, where it stirred an additional 6 h. At that point, the mixture was cooled to 0°C and slowly quenched by the addition of methanol (100 ml) before warming again to ambient temperature. Removal of the solvent *in vacuo* yielded the title compound as a white solid (5.31 g, 99%). This material was essentially pure by NMR and was used without subsequent purification. <sup>1</sup>H NMR (CDCl<sub>3</sub>): δ 7.40–7.30 (m, 5H), 5.11 (s, 2H), 3.64 (t, *J* = 6.7 Hz, 2H), 2.35 (t, *J* = 7.5 Hz, 2H), 1.67–1.60 (m, 2H), 1.60–1.53 (m, 2H), 1.36–1.23 (brm, 30H); <sup>13</sup>C NMR (CDCl<sub>3</sub>): δ 173.9, 136.3, 128.7, 128.3, 66.2, 63.2, 34.5, 33.0, 29.8, 29.8, 29.7, 29.6, 29.4, 29.3, 25.9, 25.1.

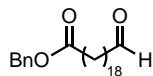

**Benzyl 20-oxoicosanoate (3).** To a stirred –78°C solution of oxalyl chloride (0.8 ml, 1.2 g, 9.8 mmol) in DCM (50 ml) was added dimethylsulfoxide (DMSO) (1.36 ml, 1.5 g, 19.2 mmol) dropwise. The mixture was stirred at –78 °C for 30 minutes, until the observed bubbling had stopped. To this solution was then added a solution of benzyl 20-hydroxyicosanoate (2.0 g, 4.8 mmol) in DCM (50 ml). The reaction was stirred at –78 °C for 90 min, during which time it became cloudy. At that point, triethylamine (Et<sub>3</sub>T) (6.64 ml, 4.84 g, 47.6 mmol) was added and the reaction continued to stir for 1 h, then was warmed to 0°C over the course of 1 h. The mixture was then poured into brine

(200 ml) and extracted with DCM (3 × 100 ml). The combined organic layers were dried over MgSO<sub>4</sub> and concentrated *in vacuo* to provide the title compound as a light yellow solid. The material was unstable at room temperature, so was either stored at –80°C for short periods of time or used immediately.

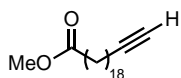

**Methyl henicos-20-ynoate (4).** Potassium carbonate (736 mg, 5.3 mmol) was added to freshly distilled methanol (30 ml) and the resulting suspension stirred 12 h, until the solution was clear. It was then cooled to 0°C and dimethyl (1-diazo-2-oxopropyl)phosphonate (550 μl, 700 mg, 3.7 mmol) was added dropwise, followed by a solution of benzyl 20-oxoicosanoate (**3**, 634 mg 1.5 mmol) in methanol (5 ml) and THF (30 ml) (**7**). The reaction continued stirring at 0°C until bubbles ceased evolving (40 min), at which point it was warmed to ambient temperature and stirred an additional 5 h. Brine (50 ml) was added to quench the reaction, then all solvents were removed *in vacuo* and the resulting residue was taken up in water (50 ml), then extracted with DCM (4 × 50 ml). The combined organic layers were dried over MgSO<sub>4</sub> and concentrated to provide the crude product as a yellow oil. Purification by flash chromatography (5% EtOAc in hexanes) gave the title product as a white powder (556 mg, 88%). NMR analysis confirmed the complete transposition of the benzyl ester to the methyl ester under the reaction conditions. <sup>1</sup>H NMR (CDCl<sub>3</sub>): δ 3.65 (s, 3H), 2.29 (t, *J* = 7.5 Hz, 2H), 2.16 (td, *J* = 7.2, 2.6 Hz, 2H), 1.92 (t, *J* = 2.6 Hz, 1H), 1.66–1.57 (m, 2H), 1.55–1.47 (m,

2H), 1.41–1.34 (m, 2H), 1.32–1.16 (brm, 26H);  $^{13}\text{C}$  NMR ( $\text{CDCl}_3$ ):  $\delta$  174.4, 84.9, 68.1, 51.5, 34.2, 29.8, 29.8, 29.7, 29.6, 29.6, 29.4, 29.3, 29.3, 28.9, 28.6, 25.1, 18.5.

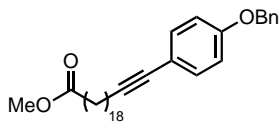

**Methyl 21-(4-(benzyloxy)phenyl)henicos-20-ynoate (5).** To a well-stirred, degassed solution of 1-benzyloxy-4-iodobenzene (693 mg, 2.24 mmol) in THF (10 ml) at ambient temperature was added bis(triphenylphosphine)palladium(II) dichloride (63 mg, 0.09 mmol), followed by copper (I) iodide (51 mg, 0.27 mmol) and  $\text{Et}_3\text{N}$  (3.7 ml, 2.72 g, 26.8 mmol). The reaction vessel was covered in aluminum foil and stirred at ambient temperature for 1 h. At that point a solution of methyl henicos-20-ynoate (**4**, 602 mg, 1.79 mmol) in THF (5 ml) was slowly added and the resulting reaction stirred at ambient temperature for 3 h before being quenched by the addition of a saturated aqueous solution of ammonium chloride (20 ml). The quenched reaction stirred at ambient temperature for 1 h before being extracted with EtOAc (4  $\times$  20 ml). The combined organic layers were washed with a saturated aqueous solution of ammonium chloride (4  $\times$  20 ml), then dried over  $\text{MgSO}_4$  and concentrated to provide the crude product as an orange solid. Purification by column chromatography (33% DCM in hexanes  $\rightarrow$  100% hexanes  $\rightarrow$  5% EtOAc in hexanes  $\rightarrow$  10% EtOAc in hexanes) furnished the title compound as a white powdery solid (676 mg, 73%).  $^1\text{H}$  NMR ( $\text{CDCl}_3$ ): 7.47–7.30 (m, 7H), 6.89 (d,  $J = 8.4$  Hz, 2H), 5.04 (s, 2H), 3.67 (s, 3H), 2.39 (t,  $J = 7.1$  Hz, 2H), 2.32 (t,  $J = 7.5$  Hz, 2H), 1.68–1.57 (m, 4H), 1.50–1.43 (m, 2H), 1.38–1.23 (brm, 26H);  $^{13}\text{C}$  NMR ( $\text{CDCl}_3$ ):  $\delta$  174.2, 158.2, 136.8, 132.9, 132.9, 128.6, 128.0, 127.5, 127.4, 116.7, 114.7,

114.7, 88.9, 80.3, 70.0, 51.4, 34.1, 29.8, 29.7, 29.7, 29.6, 29.5, 29.3, 29.3, 29.2, 29.0, 29.0, 25.0, 19.5.

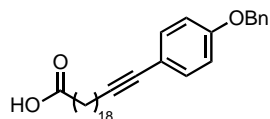

**21-(4-(Benzyloxy)phenyl)henicos-20-ynoic acid.** To a stirred solution of methyl 21-(4-(benzyloxy)phenyl)henicos-20-ynoate (**5**, 676 mg, 1.3 mmol) in THF (20 ml) was added lithium hydroxide (2 M solution in water, 14 ml). The reaction was heated to 40°C and stirred for 1 d, then cooled to ambient temperature and diluted with an aqueous solution of sodium bisulfate (10% wt/wt, 20 ml) (B. Iliev, A. Linden, R. Kunz, and H. Heimgartner, *Tetrahedron* 62:1079-1094, 2006). The resulting mixture was vigorously stirred for 5 min at which point a pH measurement indicated 1.5. The solution was extracted with EtOAc (4 × 25 ml) and the combined organic layers were dried (MgSO<sub>4</sub>) then concentrated *in vacuo* to provide the title compound as a white powder (623 mg, 95%). NMR analysis indicated the product was effectively pure, so it was carried on without further purification. <sup>1</sup>H NMR (CDCl<sub>3</sub>): δ 7.47–7.29 (m, 7H), 6.89 (d, *J* = 8.3 Hz, 2H), 5.06 (s, 2H), 2.39 (t, *J* = 7.1 Hz, 2H), 2.35 (t, *J* = 7.5 Hz, 2H), 1.70–1.55 (m, 4H), 1.49–1.41 (m, 2H), 1.40–1.23 (brm, 26H); <sup>13</sup>C NMR (CDCl<sub>3</sub>): δ 179.8, 158.4, 137.0, 133.0, 128.7, 128.1, 127.6, 116.9, 115.0, 89.1, 80.4, 70.2, 34.2, 29.8, 29.8, 29.7, 29.7, 29.6, 29.4, 29.3, 29.2, 29.1, 29.1, 24.9, 19.6.



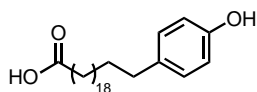

**21-(4-hydroxyphenyl)henicosanoic acid (s-PHPA, 6).** A dry three-necked flask was charged with 10% palladium on activated carbon (100 mg) and two of the necks were sealed with a rubber septum. The third was sealed with a fritted glass vacuum adapter and a vacuum was applied. The flask was back-filled with argon and the process repeated (3x). At that point, EtOAc (75 ml) and a solution of 21-(4-(benzyloxy)phenyl)henicos-20-ynoic acid (623 mg, 1.2 mmol) in EtOAc (25 ml) were added. A balloon filled with H<sub>2</sub> gas was attached and the flask purged using the vacuum-fill method as described above (4x). A fresh H<sub>2</sub> balloon was attached and the reaction heated to 40°C under vigorous stirring. It was kept at this temperature for 3 h and then warmed to 50°C, where it stirred an additional 20 h before being cooled to ambient temperature and filtered through a pad of Celite. The residue was washed with EtOAc (3 × 25 ml) and the combined filtrate and washings were concentrated *in vacuo* to provide the title compound as a white solid (504 mg, 98%). NMR analysis indicated no purification was necessary. <sup>1</sup>H NMR (DMSO-d<sub>6</sub>): δ 11.96 (s, 1H), 9.08 (s, 1H), 6.95 (d, *J* = 8.0 Hz, 2H), 6.65 (d, *J* = 8.0 Hz, 2H), 2.43 (t, *J* = 7.7 Hz, 2H), 2.18 (t, *J* = 7.3 Hz, 2H), 1.53–1.43 (m, 4H), 1.28–1.18 (brm, 32H); <sup>13</sup>C NMR (DMSO-d<sub>6</sub>): δ 174.5, 155.2, 132.3, 129.0, 114.9, 34.3, 33.7, 31.3, 29.0, 28.9, 28.9, 28.7, 28.6, 28.

20-(benzyloxy)-20-oxoicosanoic acid

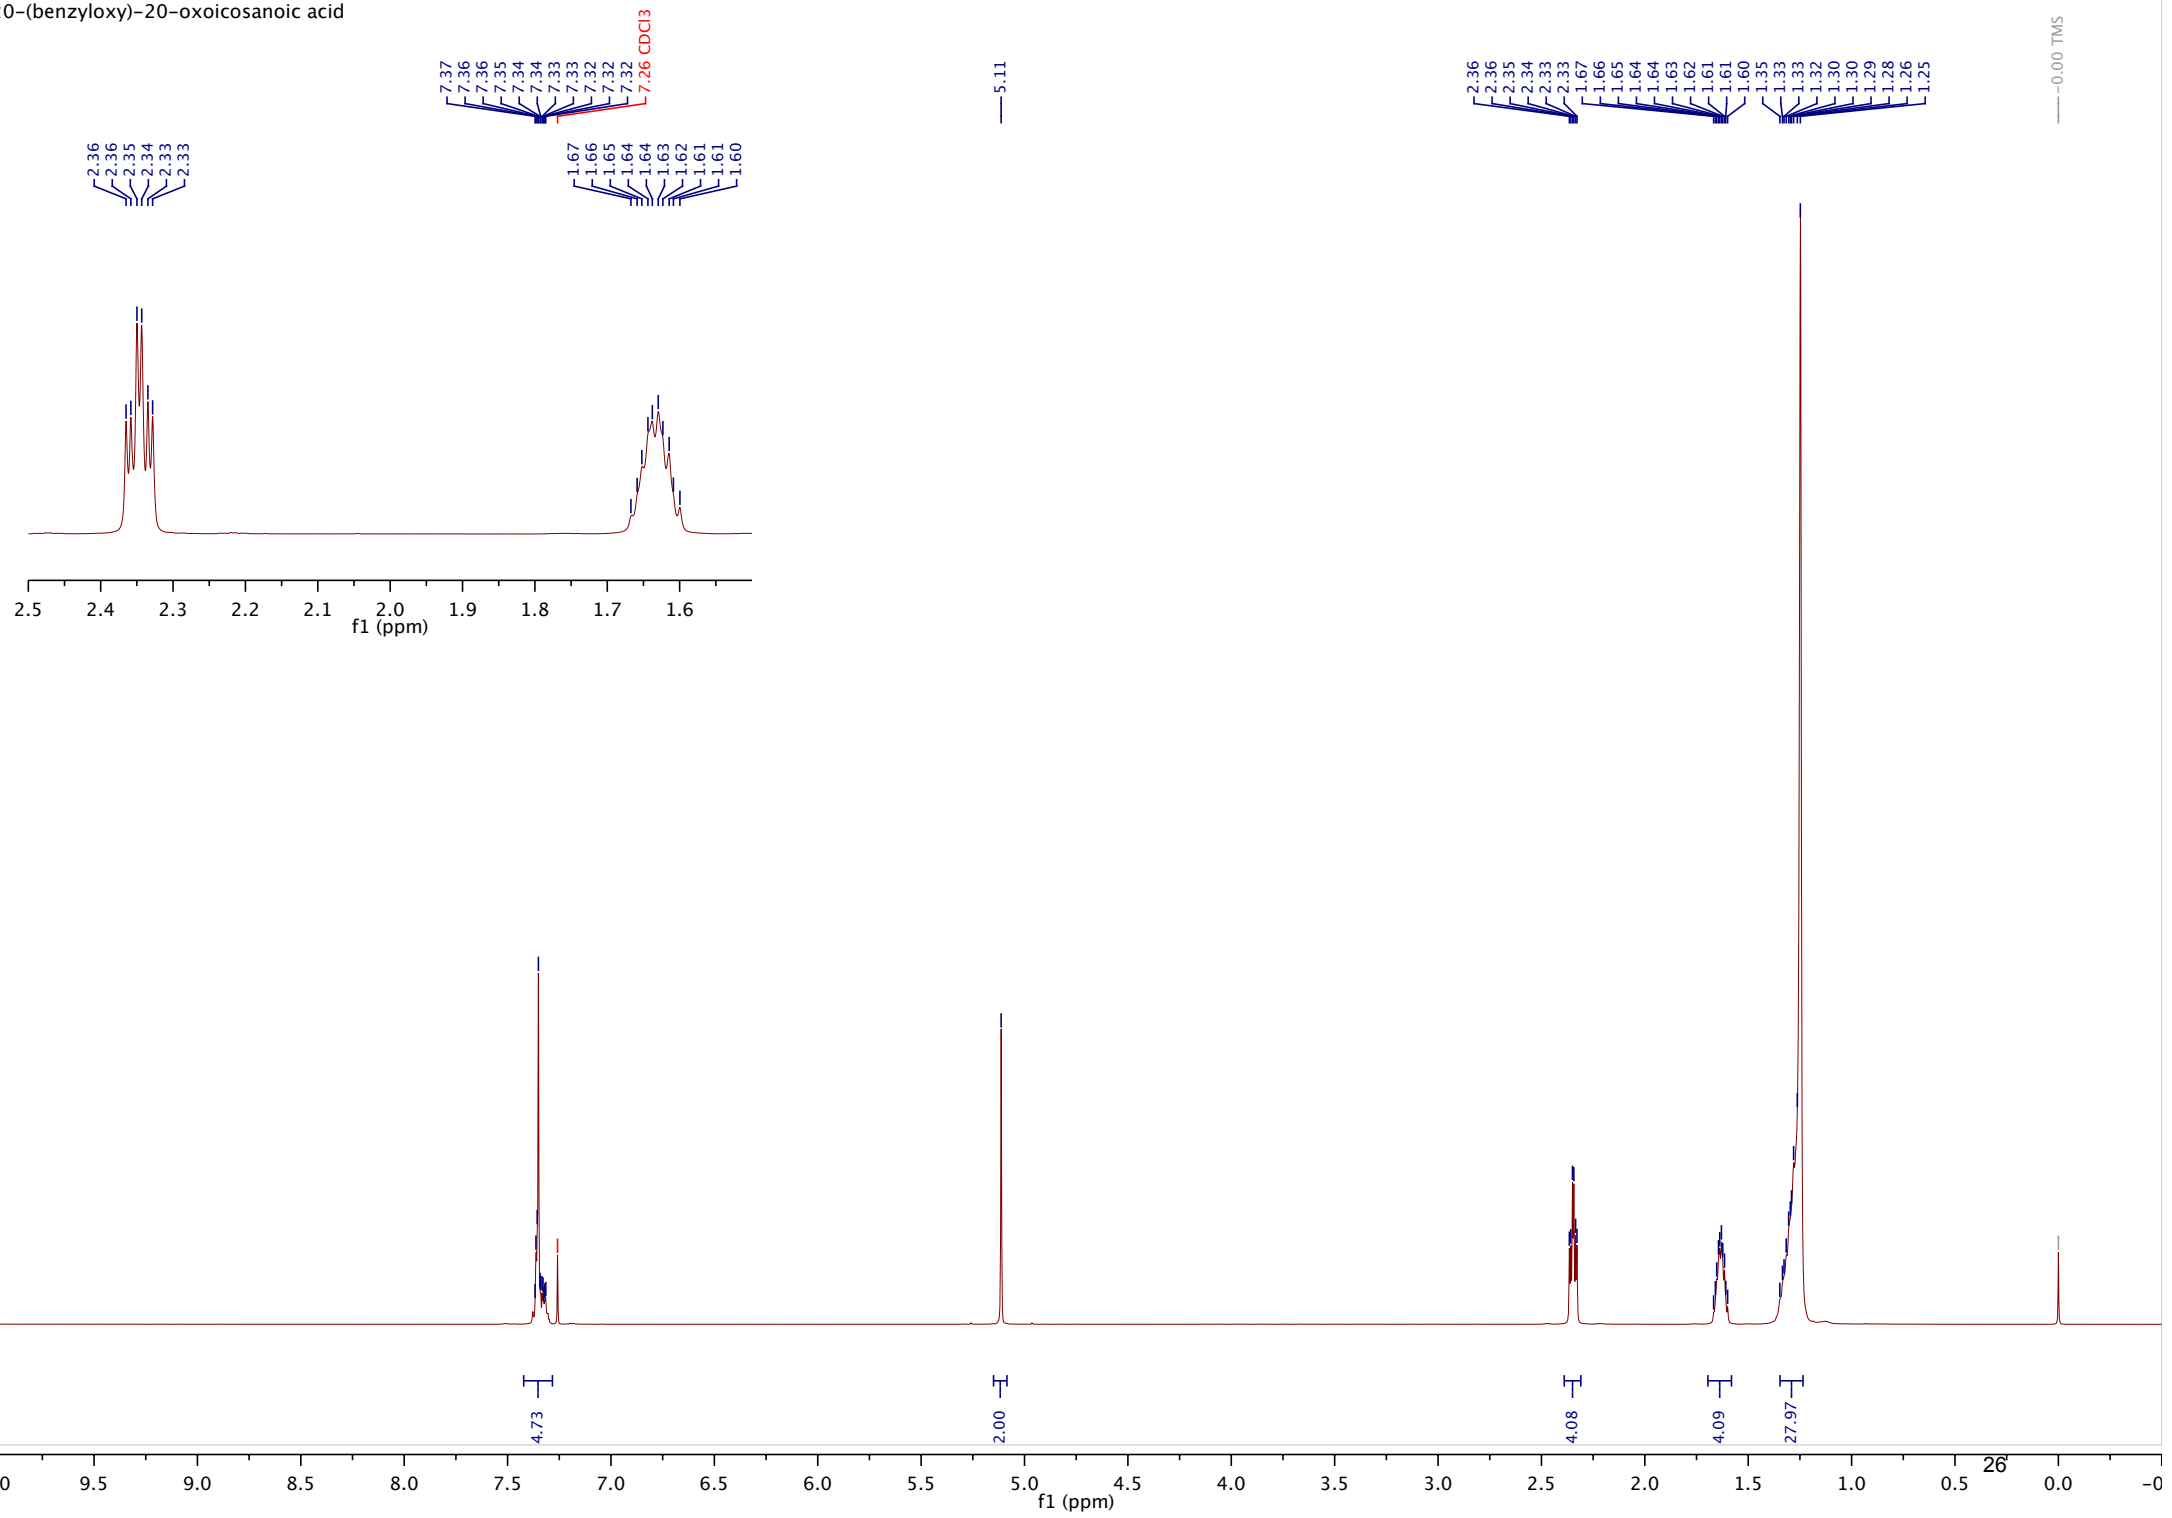

20-(benzyloxy)-20-oxoicosanoic acid

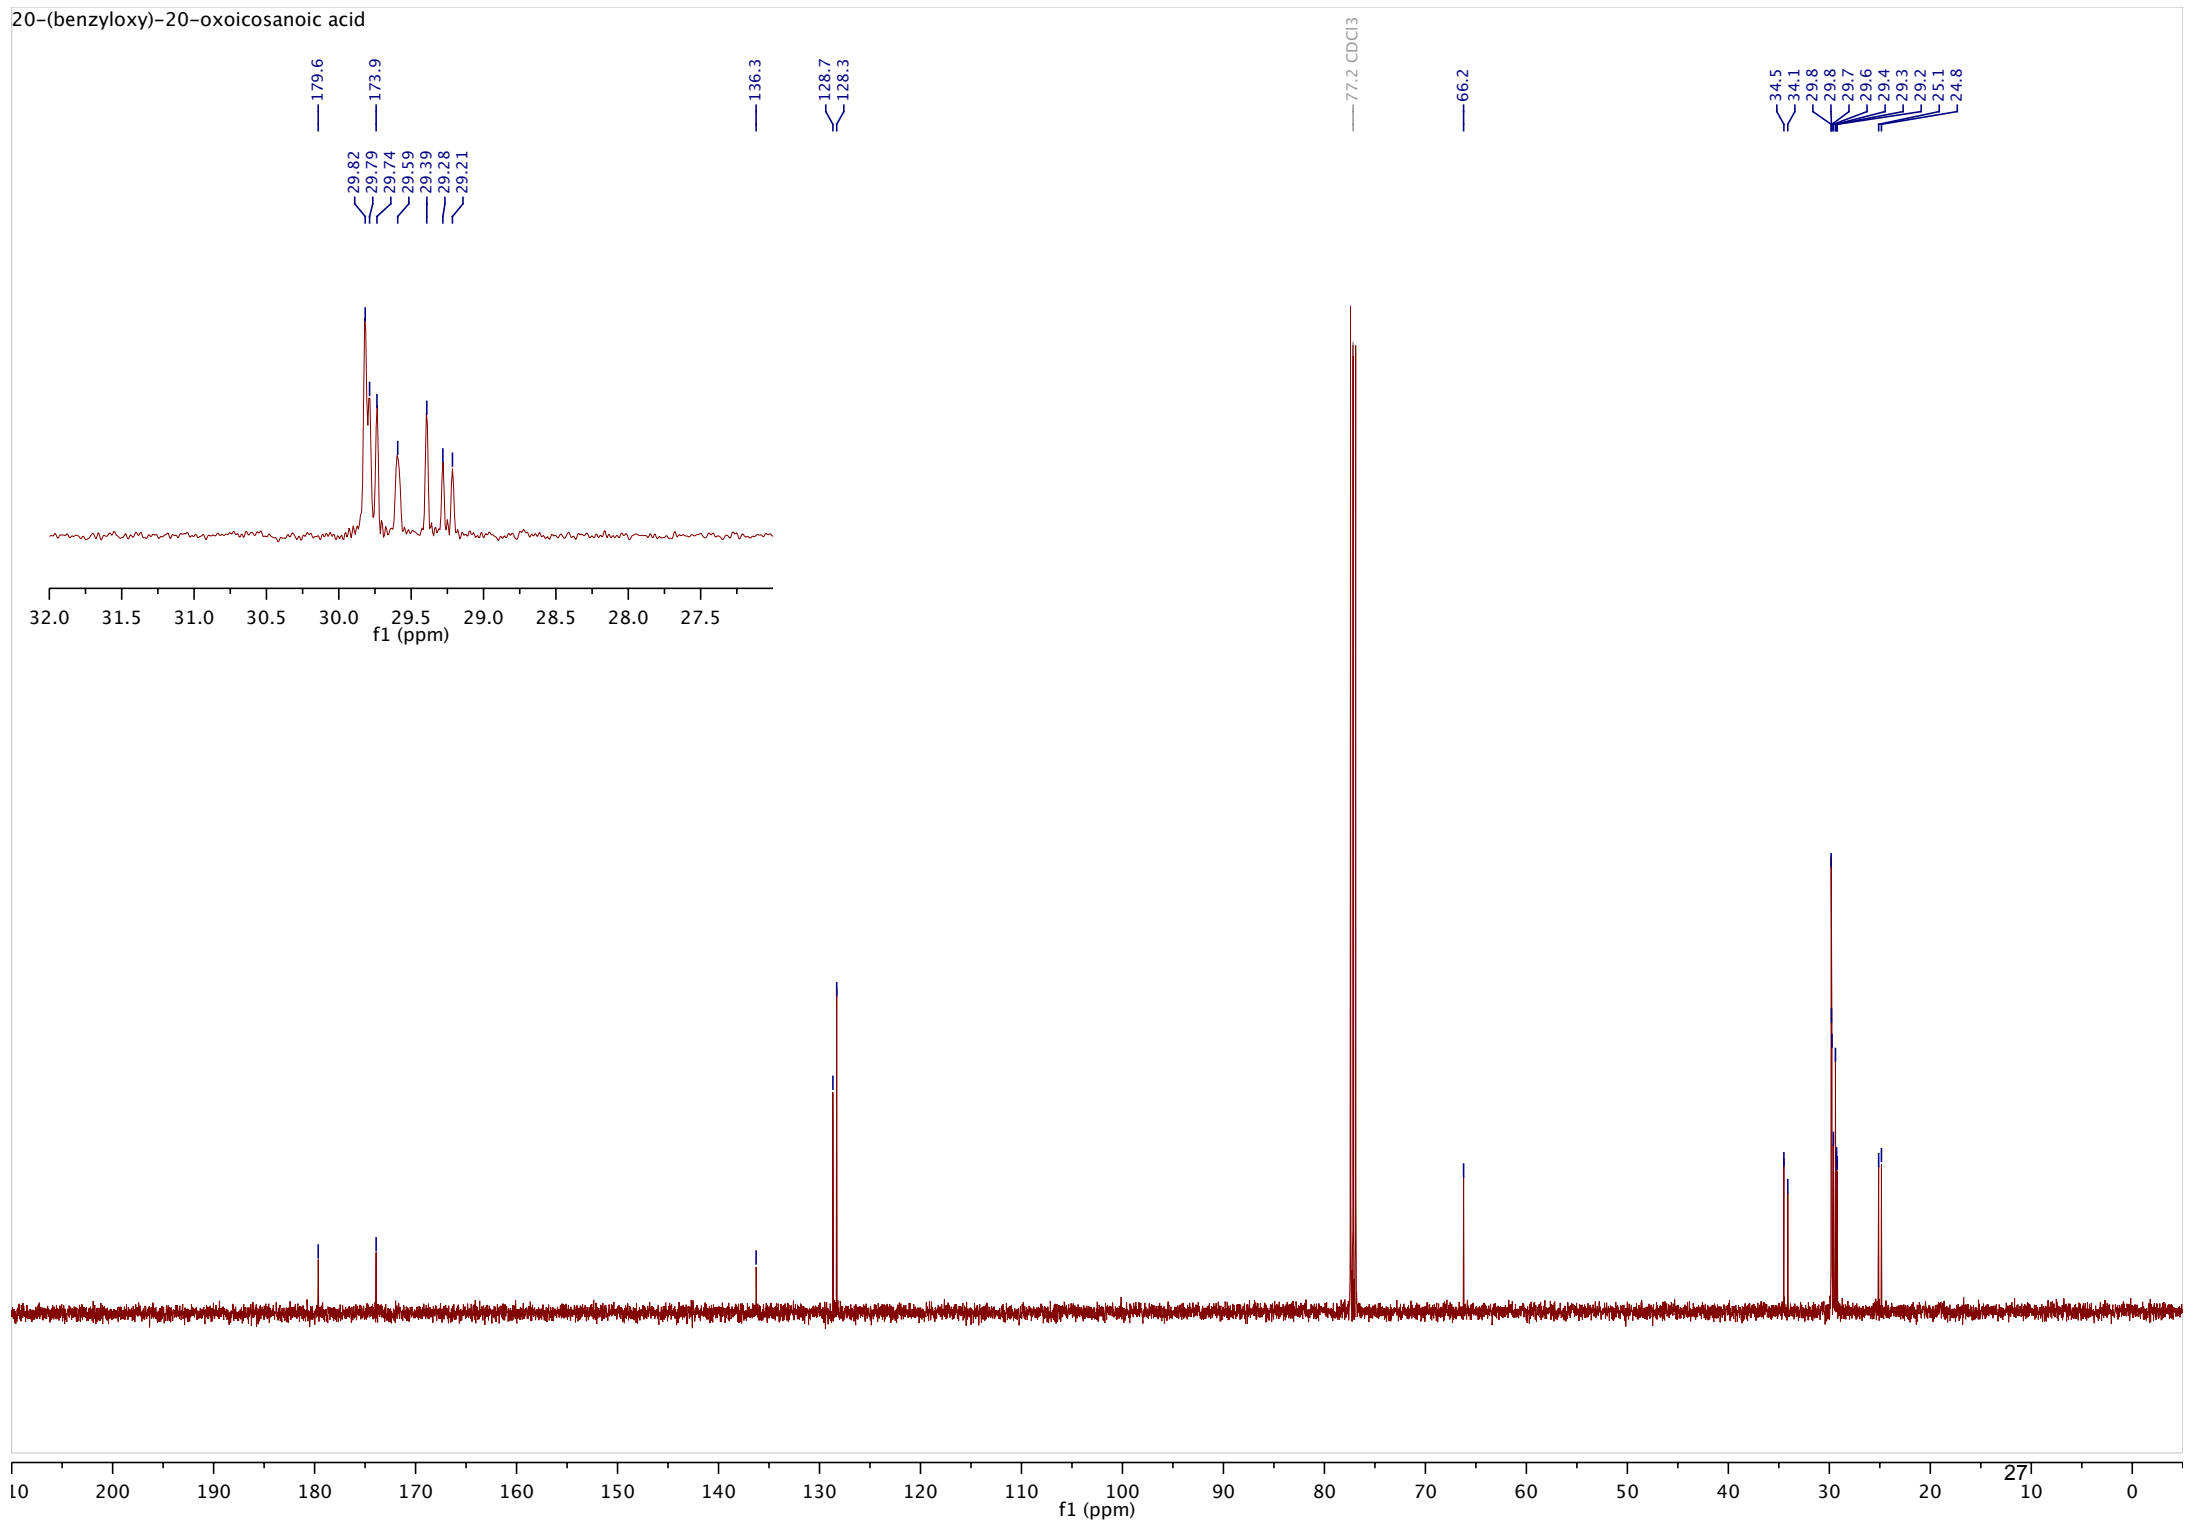

benzyl 20-hydroxyicosanoate

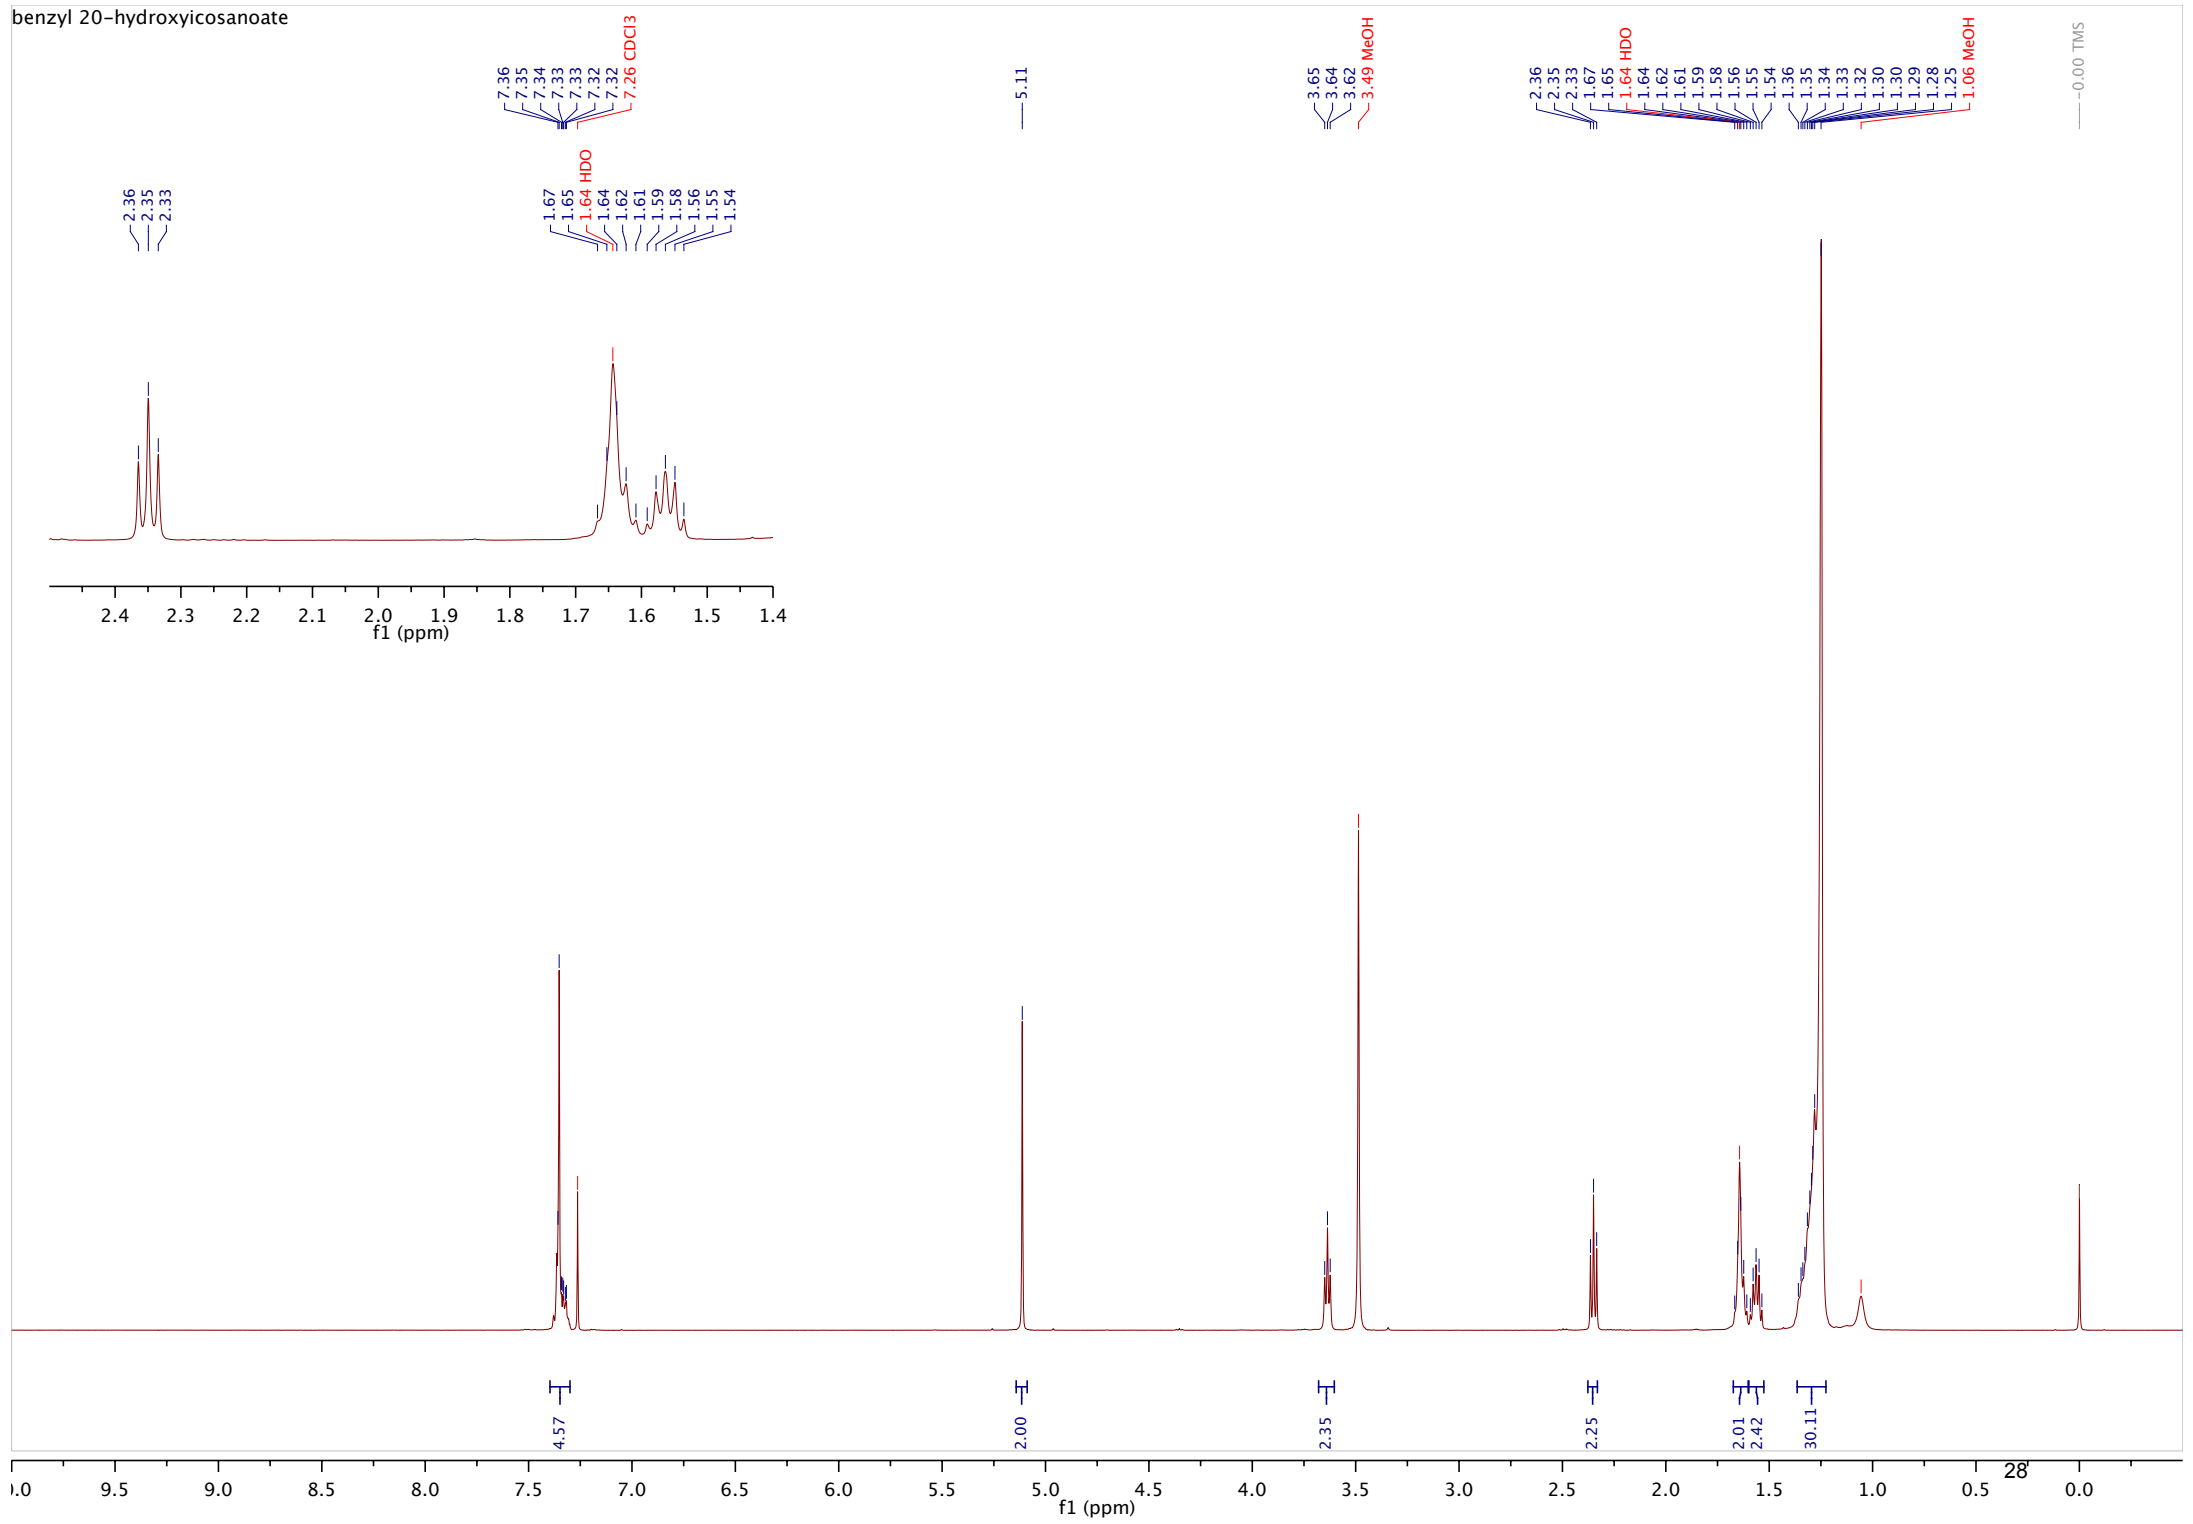

benzyl 20-hydroxyicosanoate

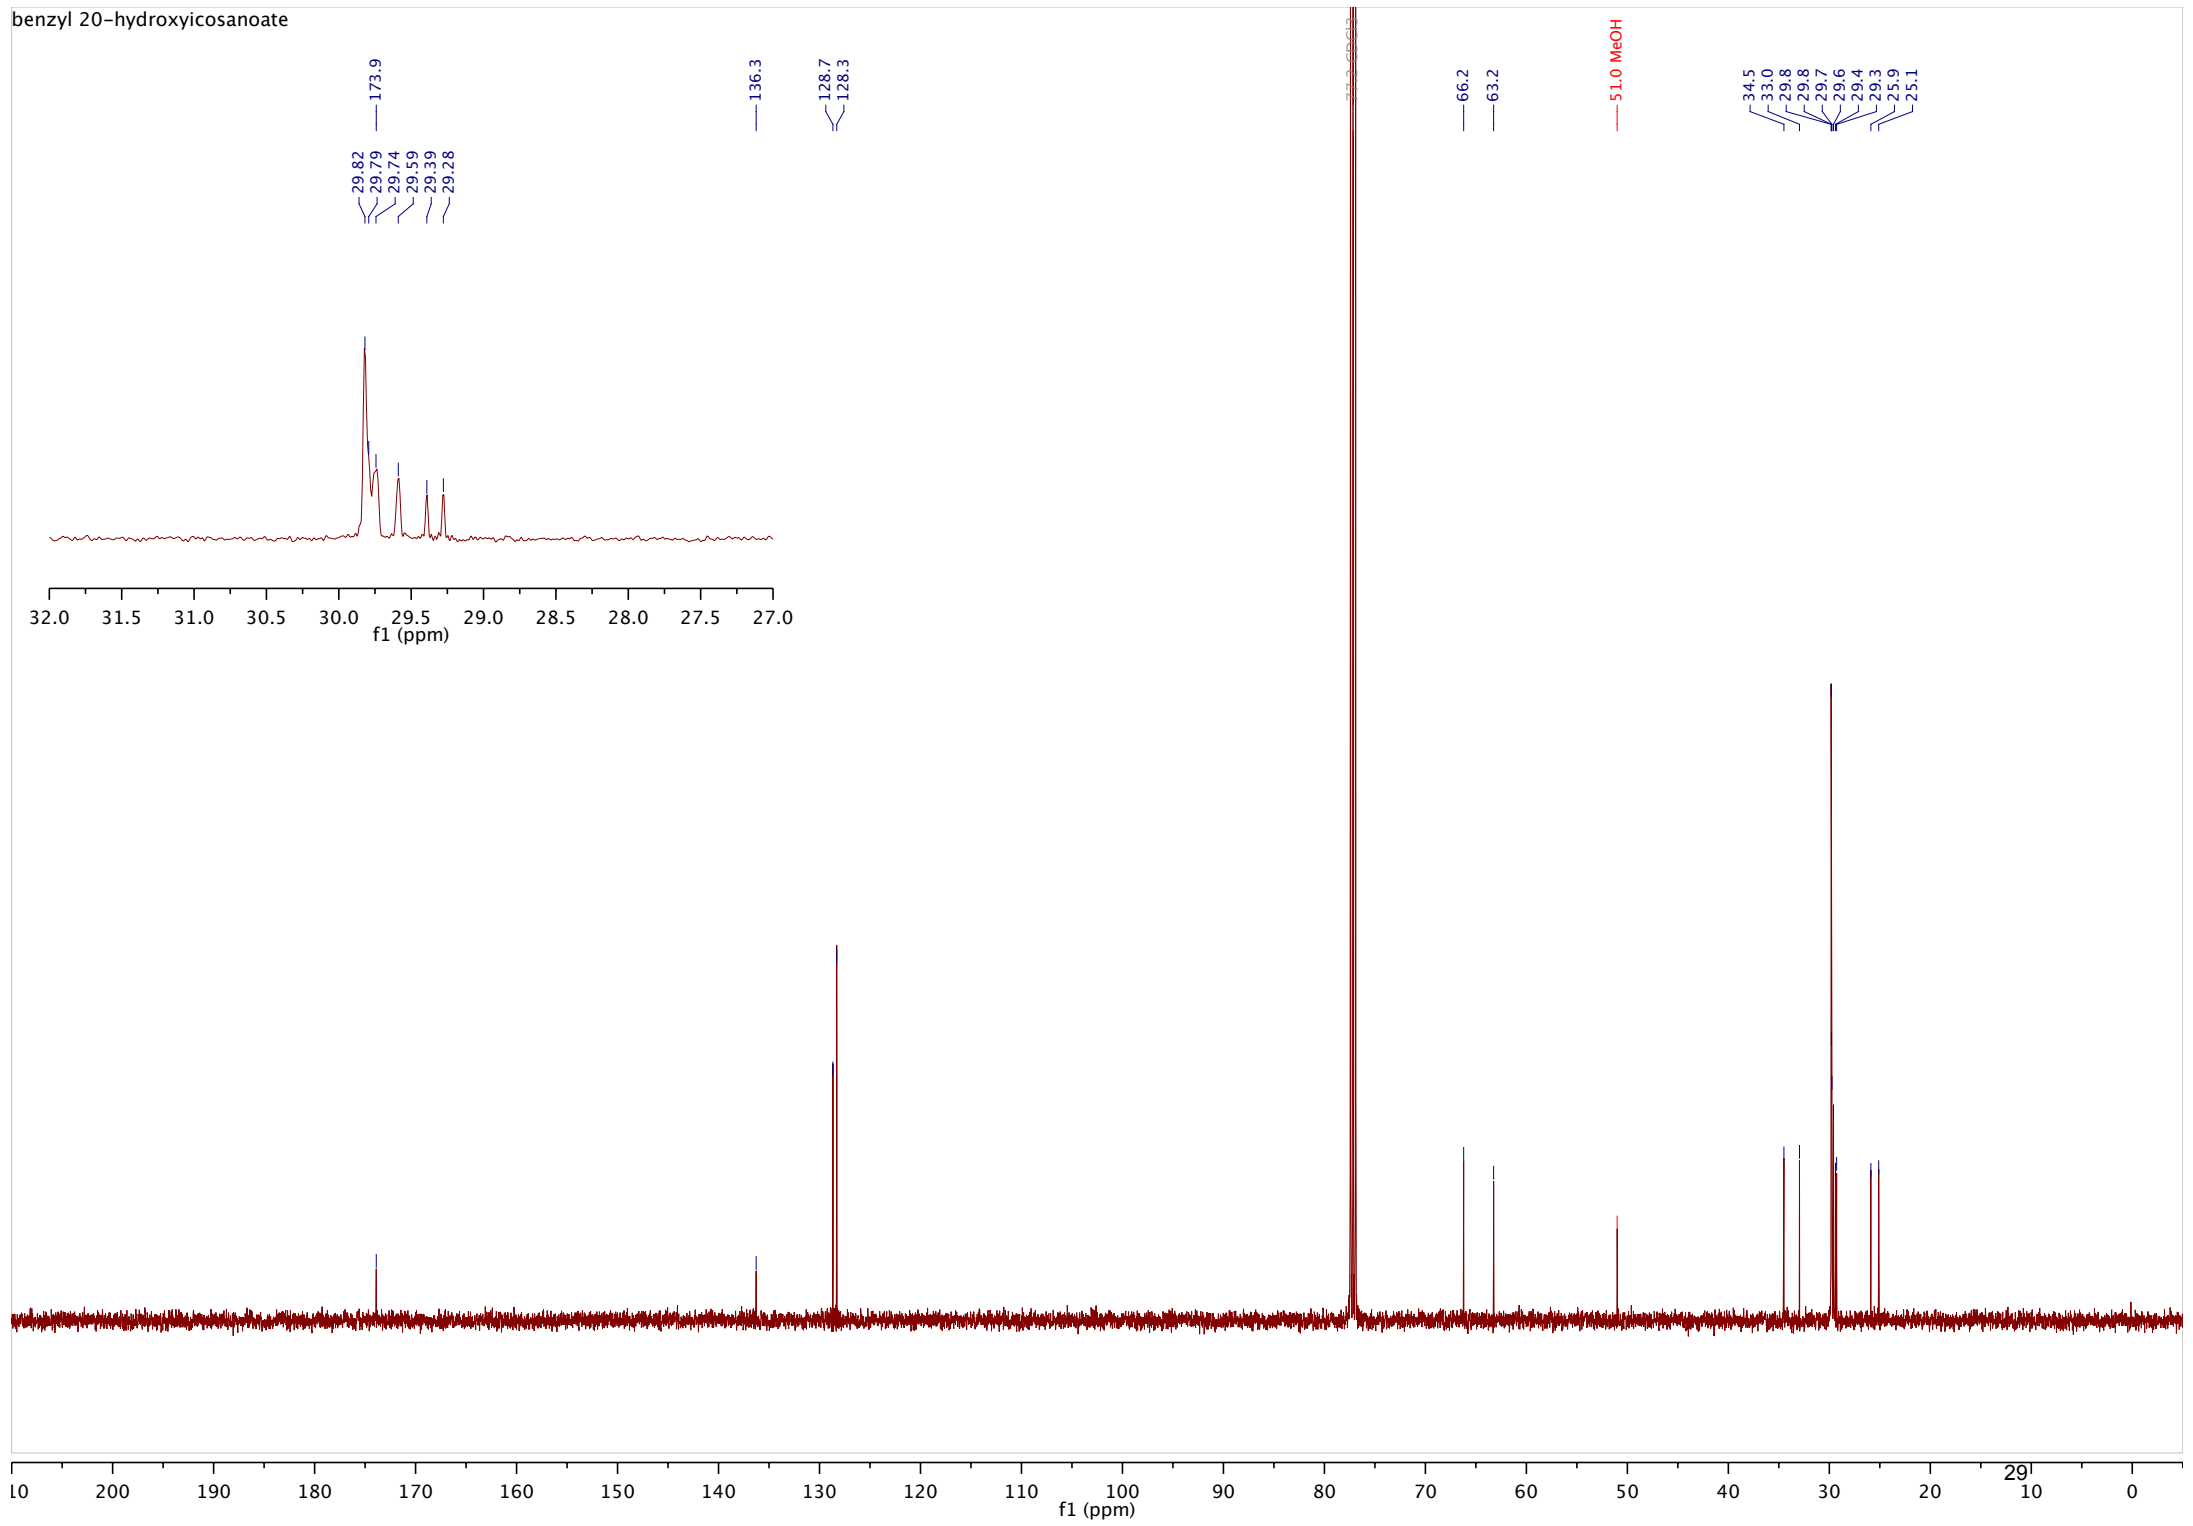

methyl henicos-20-ynoate

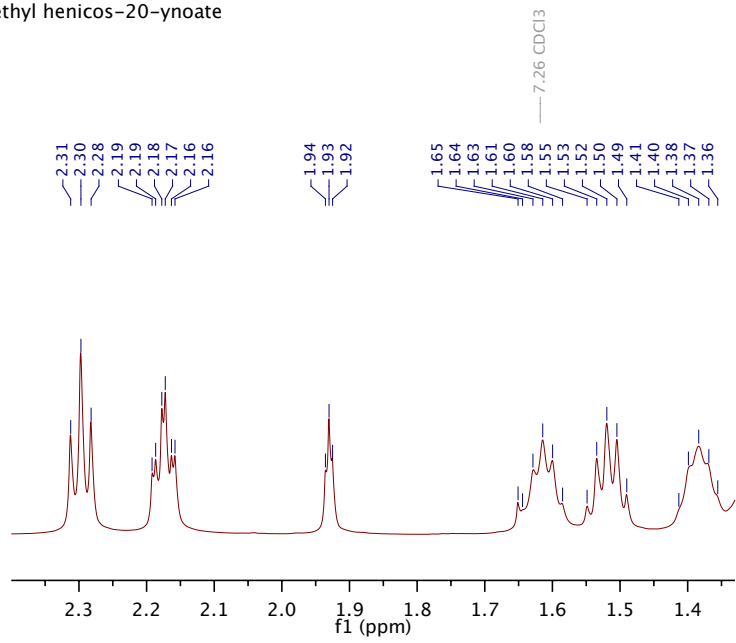

2.30  
2.29  
2.27  
2.18  
2.17  
2.16  
2.15  
2.15  
1.92  
1.91  
1.64  
1.63  
1.62  
1.60  
1.59  
1.57  
1.54  
1.52  
1.51  
1.49  
1.48  
1.40  
1.39  
1.37  
1.36  
1.34  
1.30  
1.29  
1.27  
1.26  
1.24

3.65

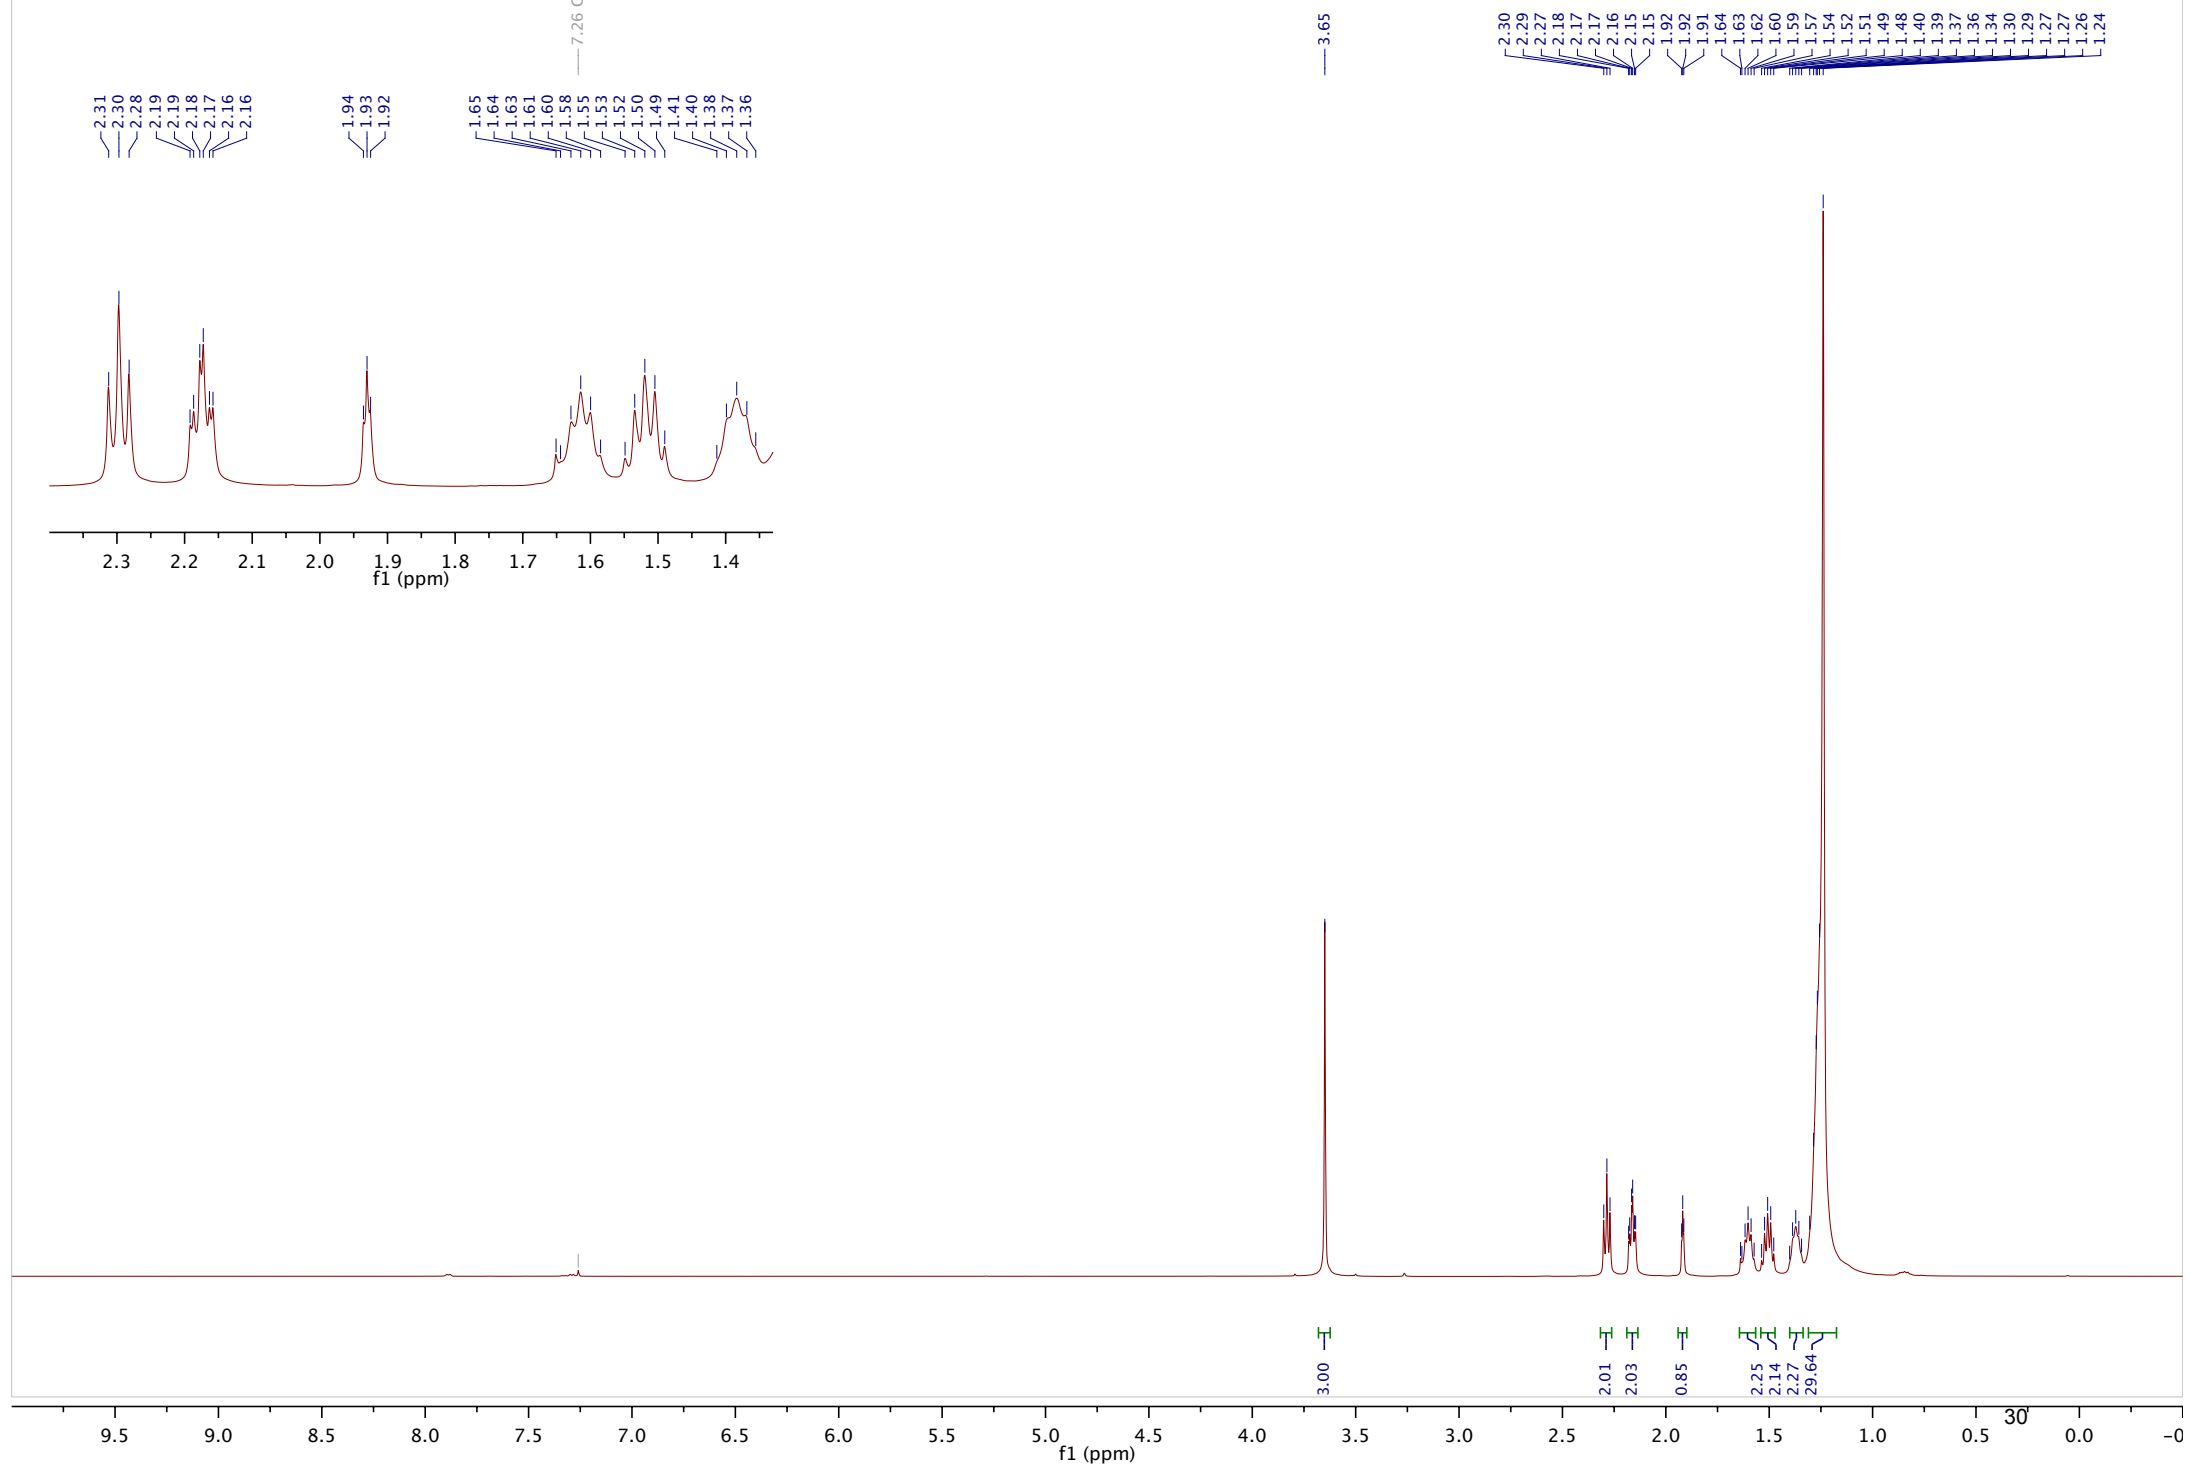

30

methyl henicos-20-ynoate

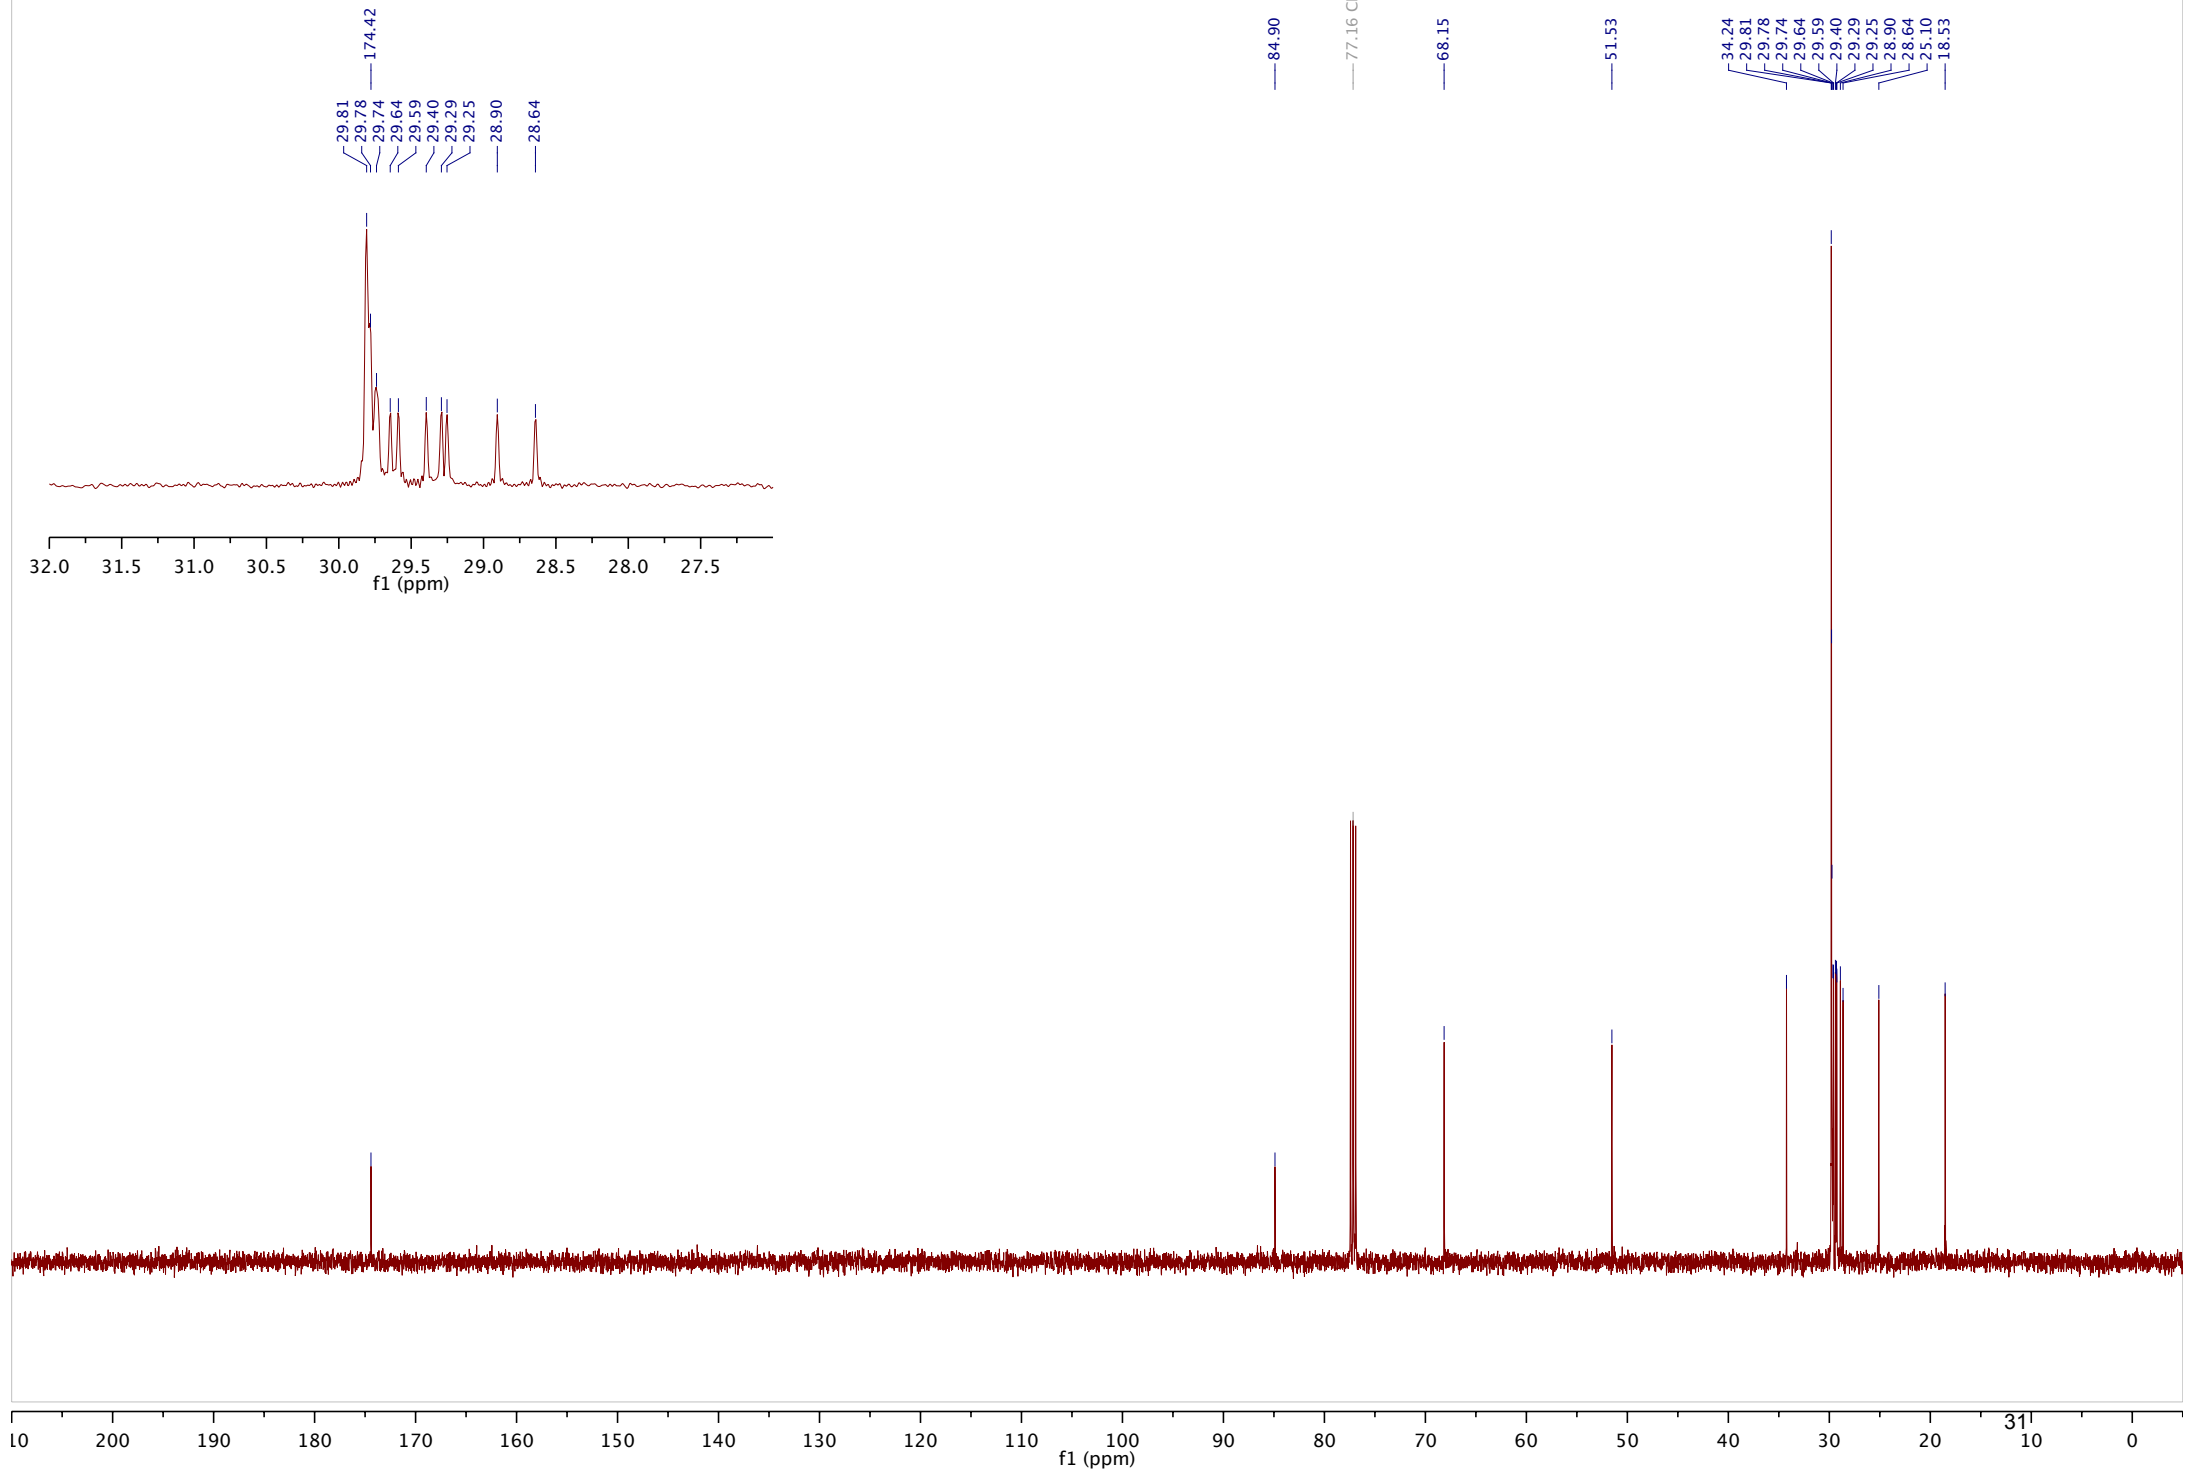

methyl 21-(4-(benzyloxy)phenyl)henicos-20-ynoate

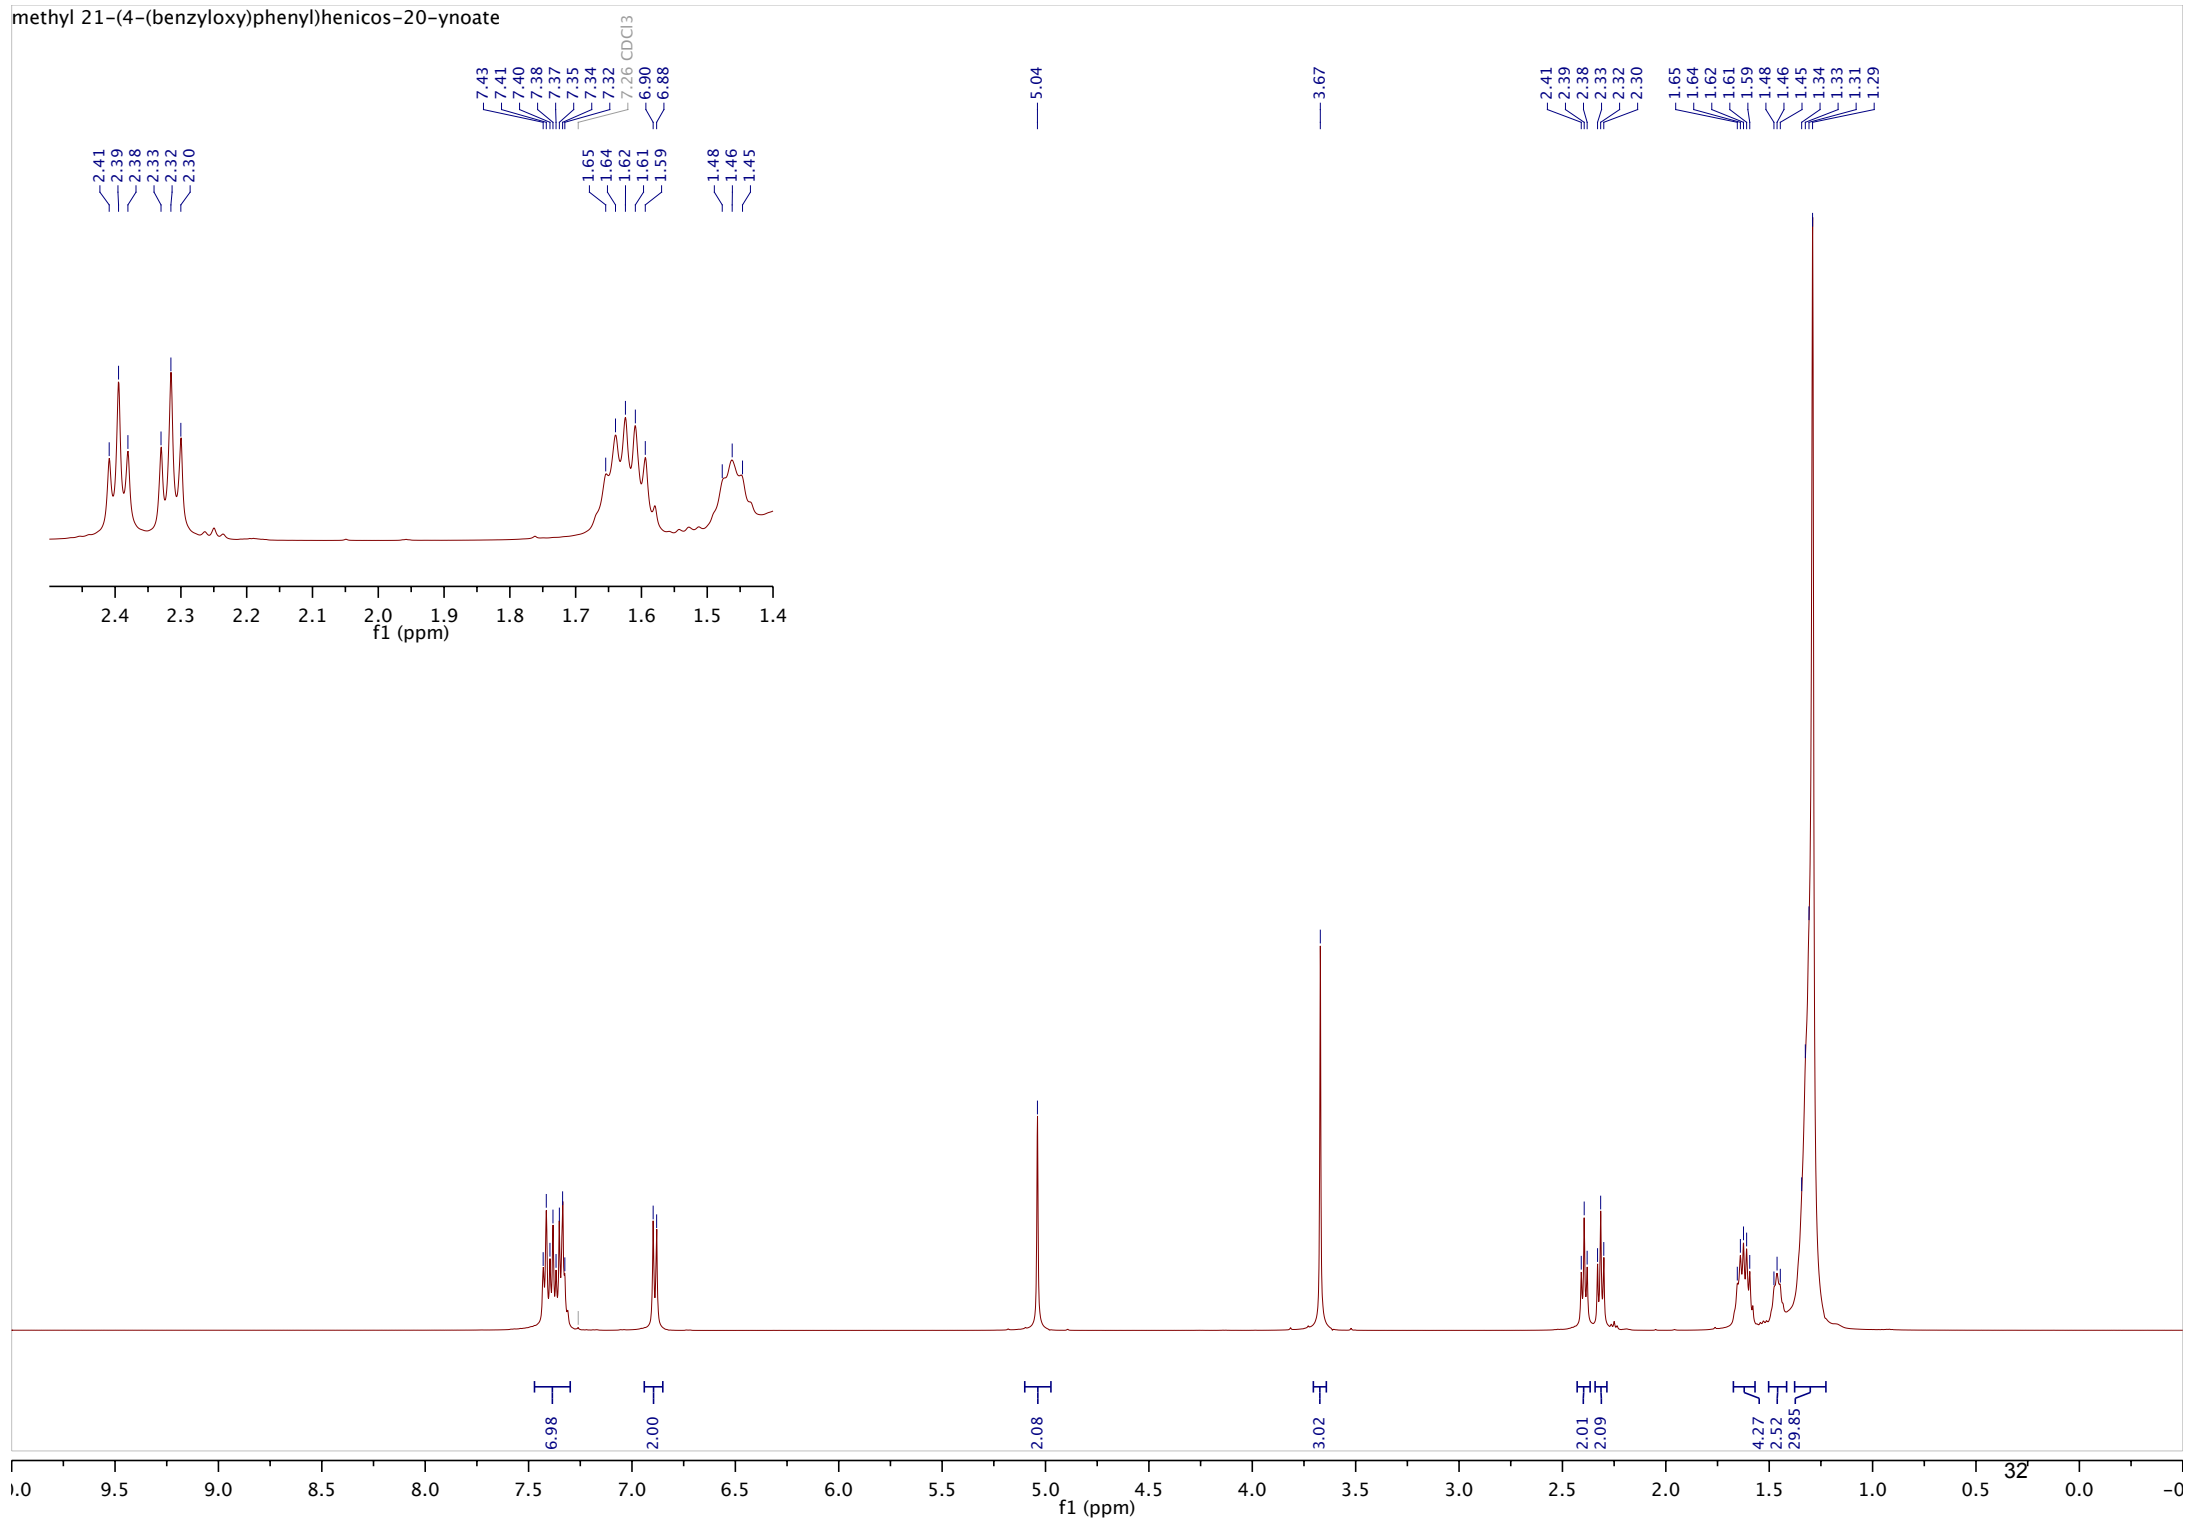



methyl 21-(4-(benzyloxy)phenyl)henicos-20-ynoate

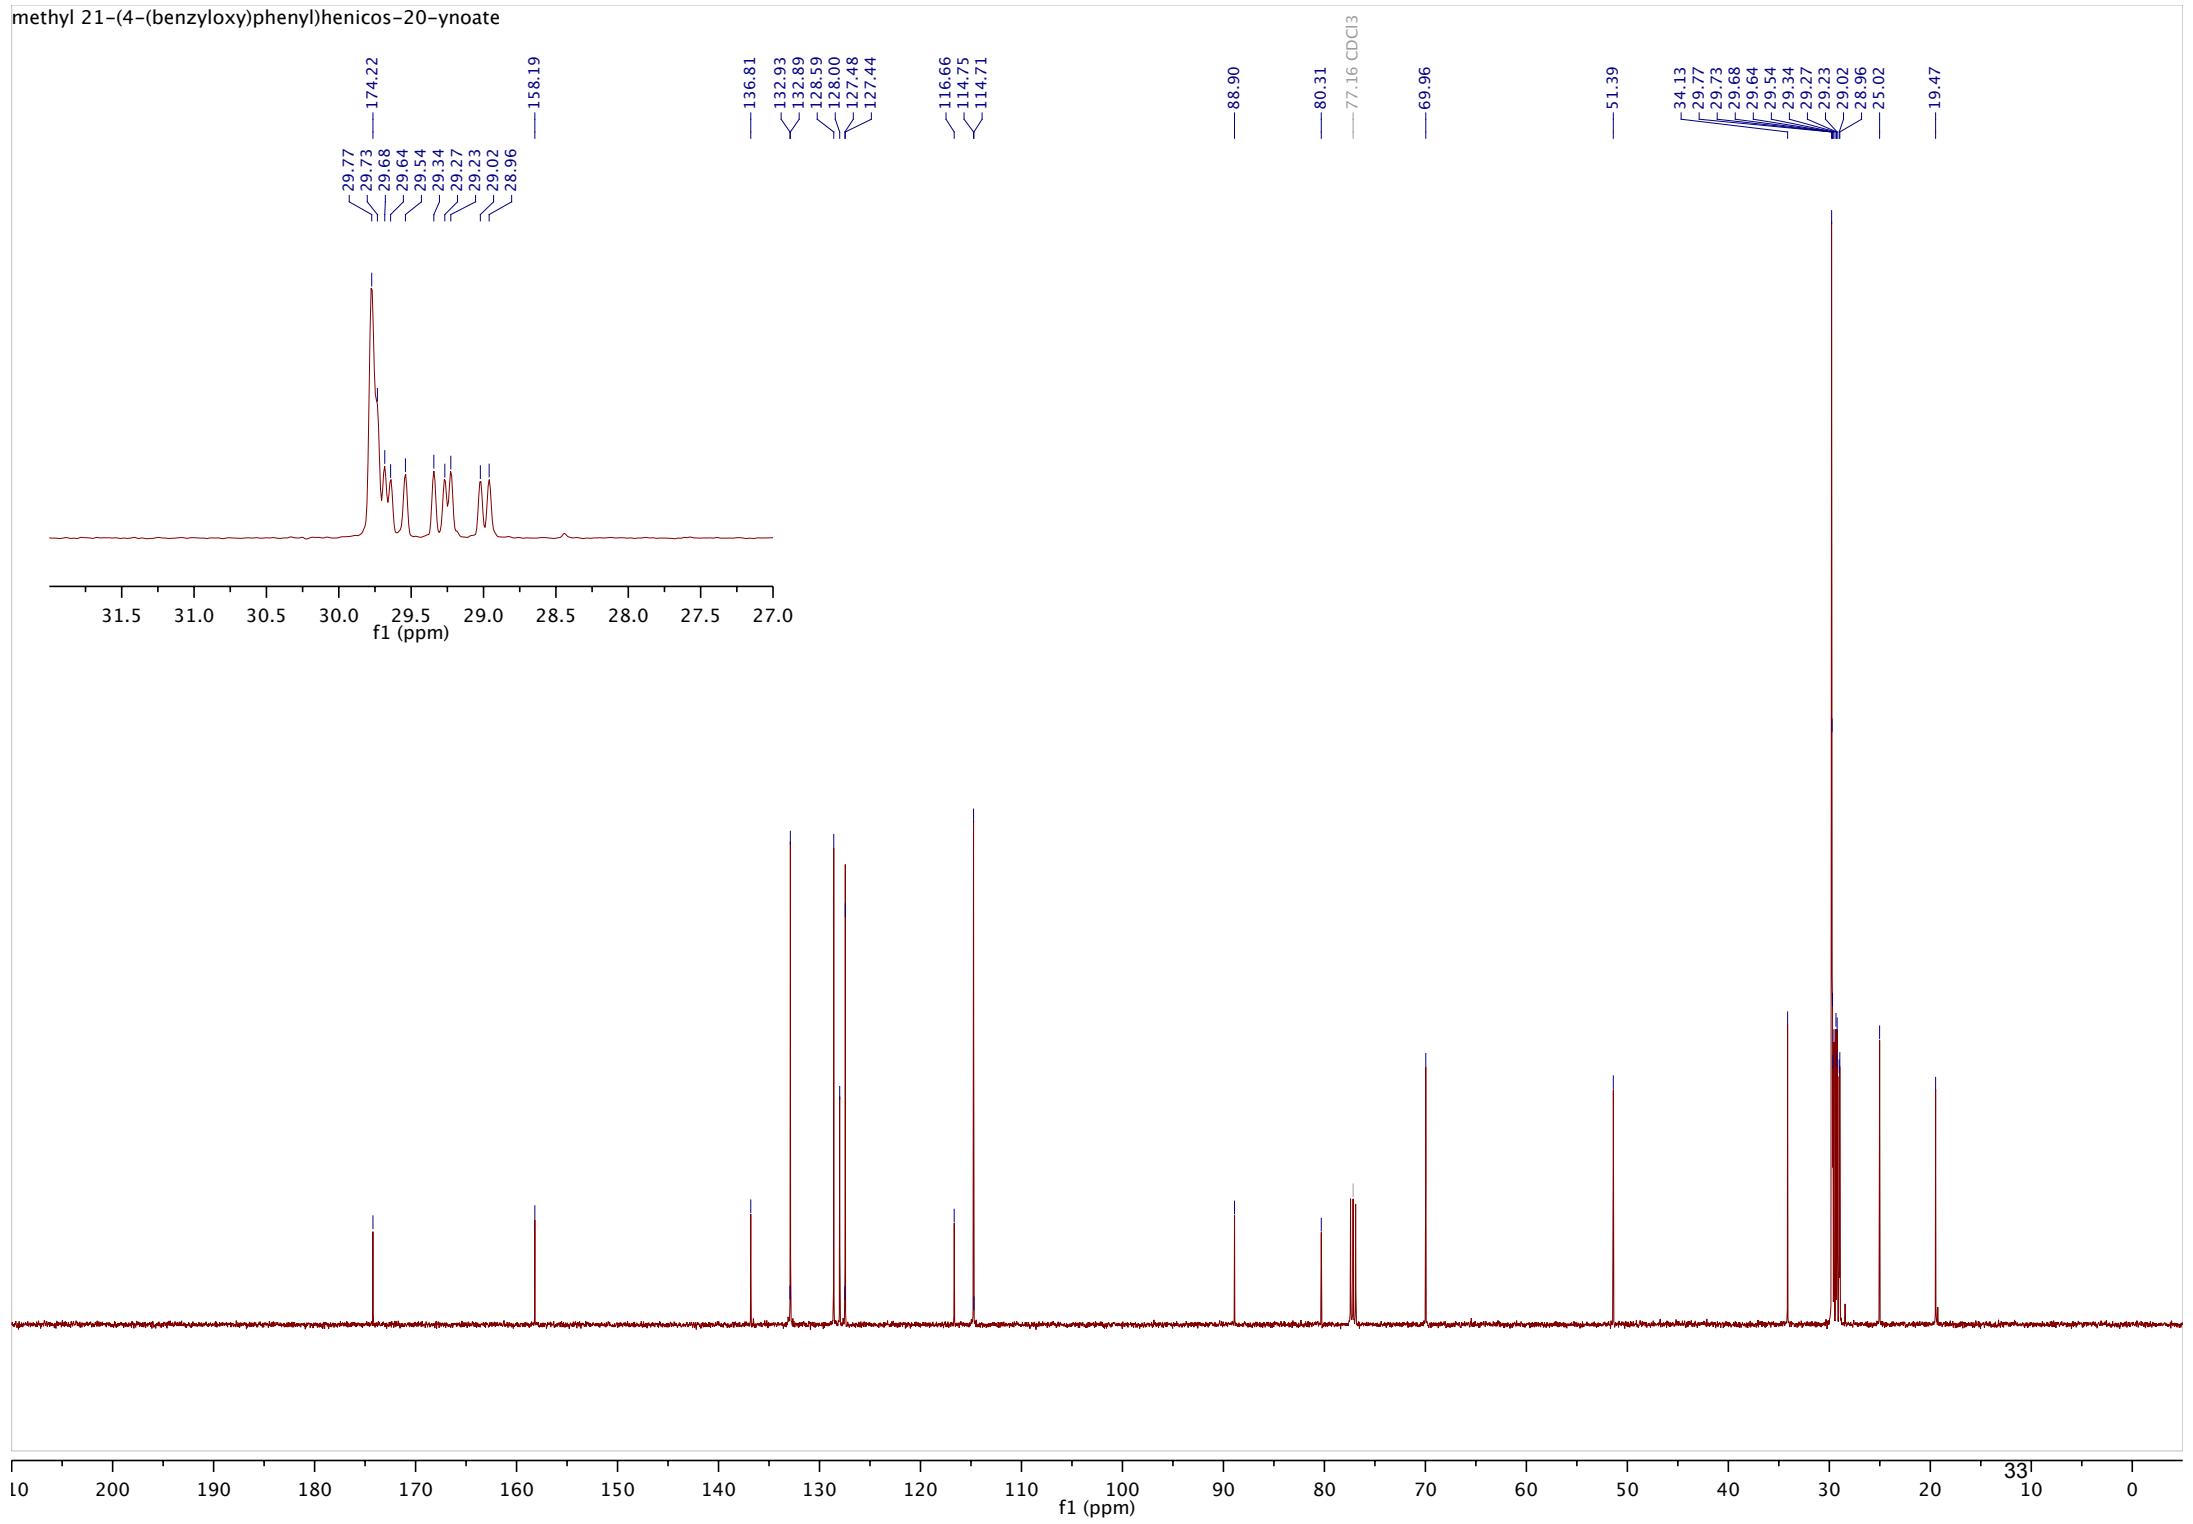

21-(4-(benzyloxy)phenyl)henicos-20-ynoic acid

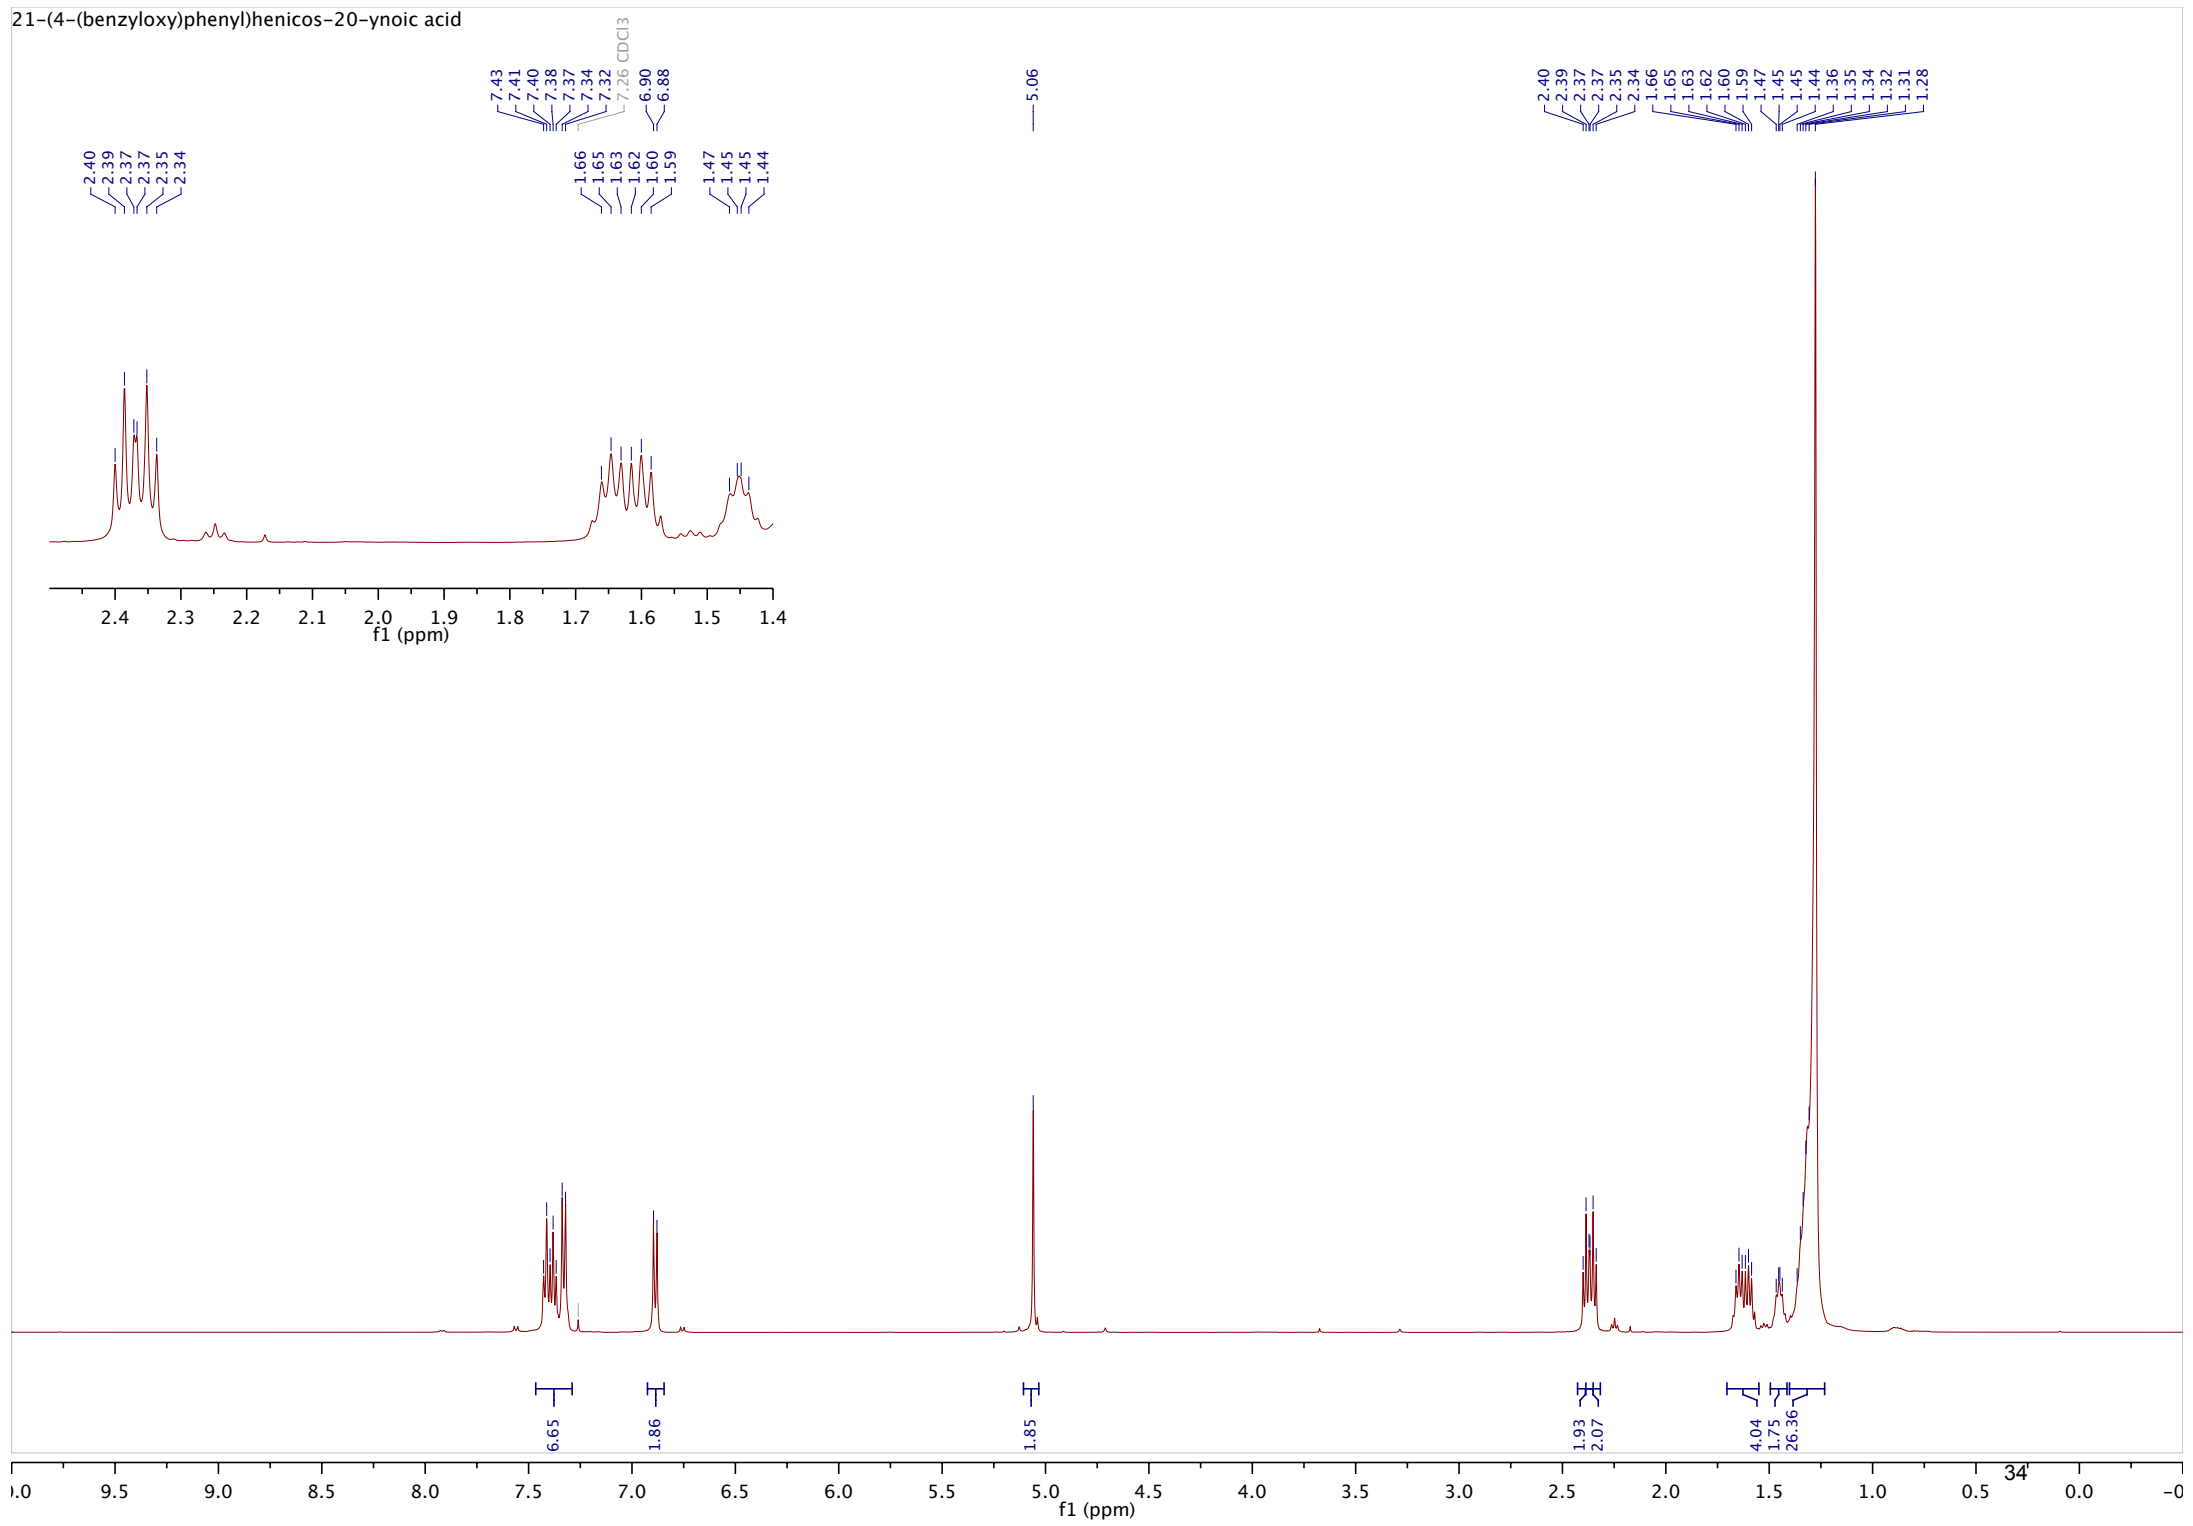

21-(4-(benzyloxy)phenyl)henicos-20-ynoic acid

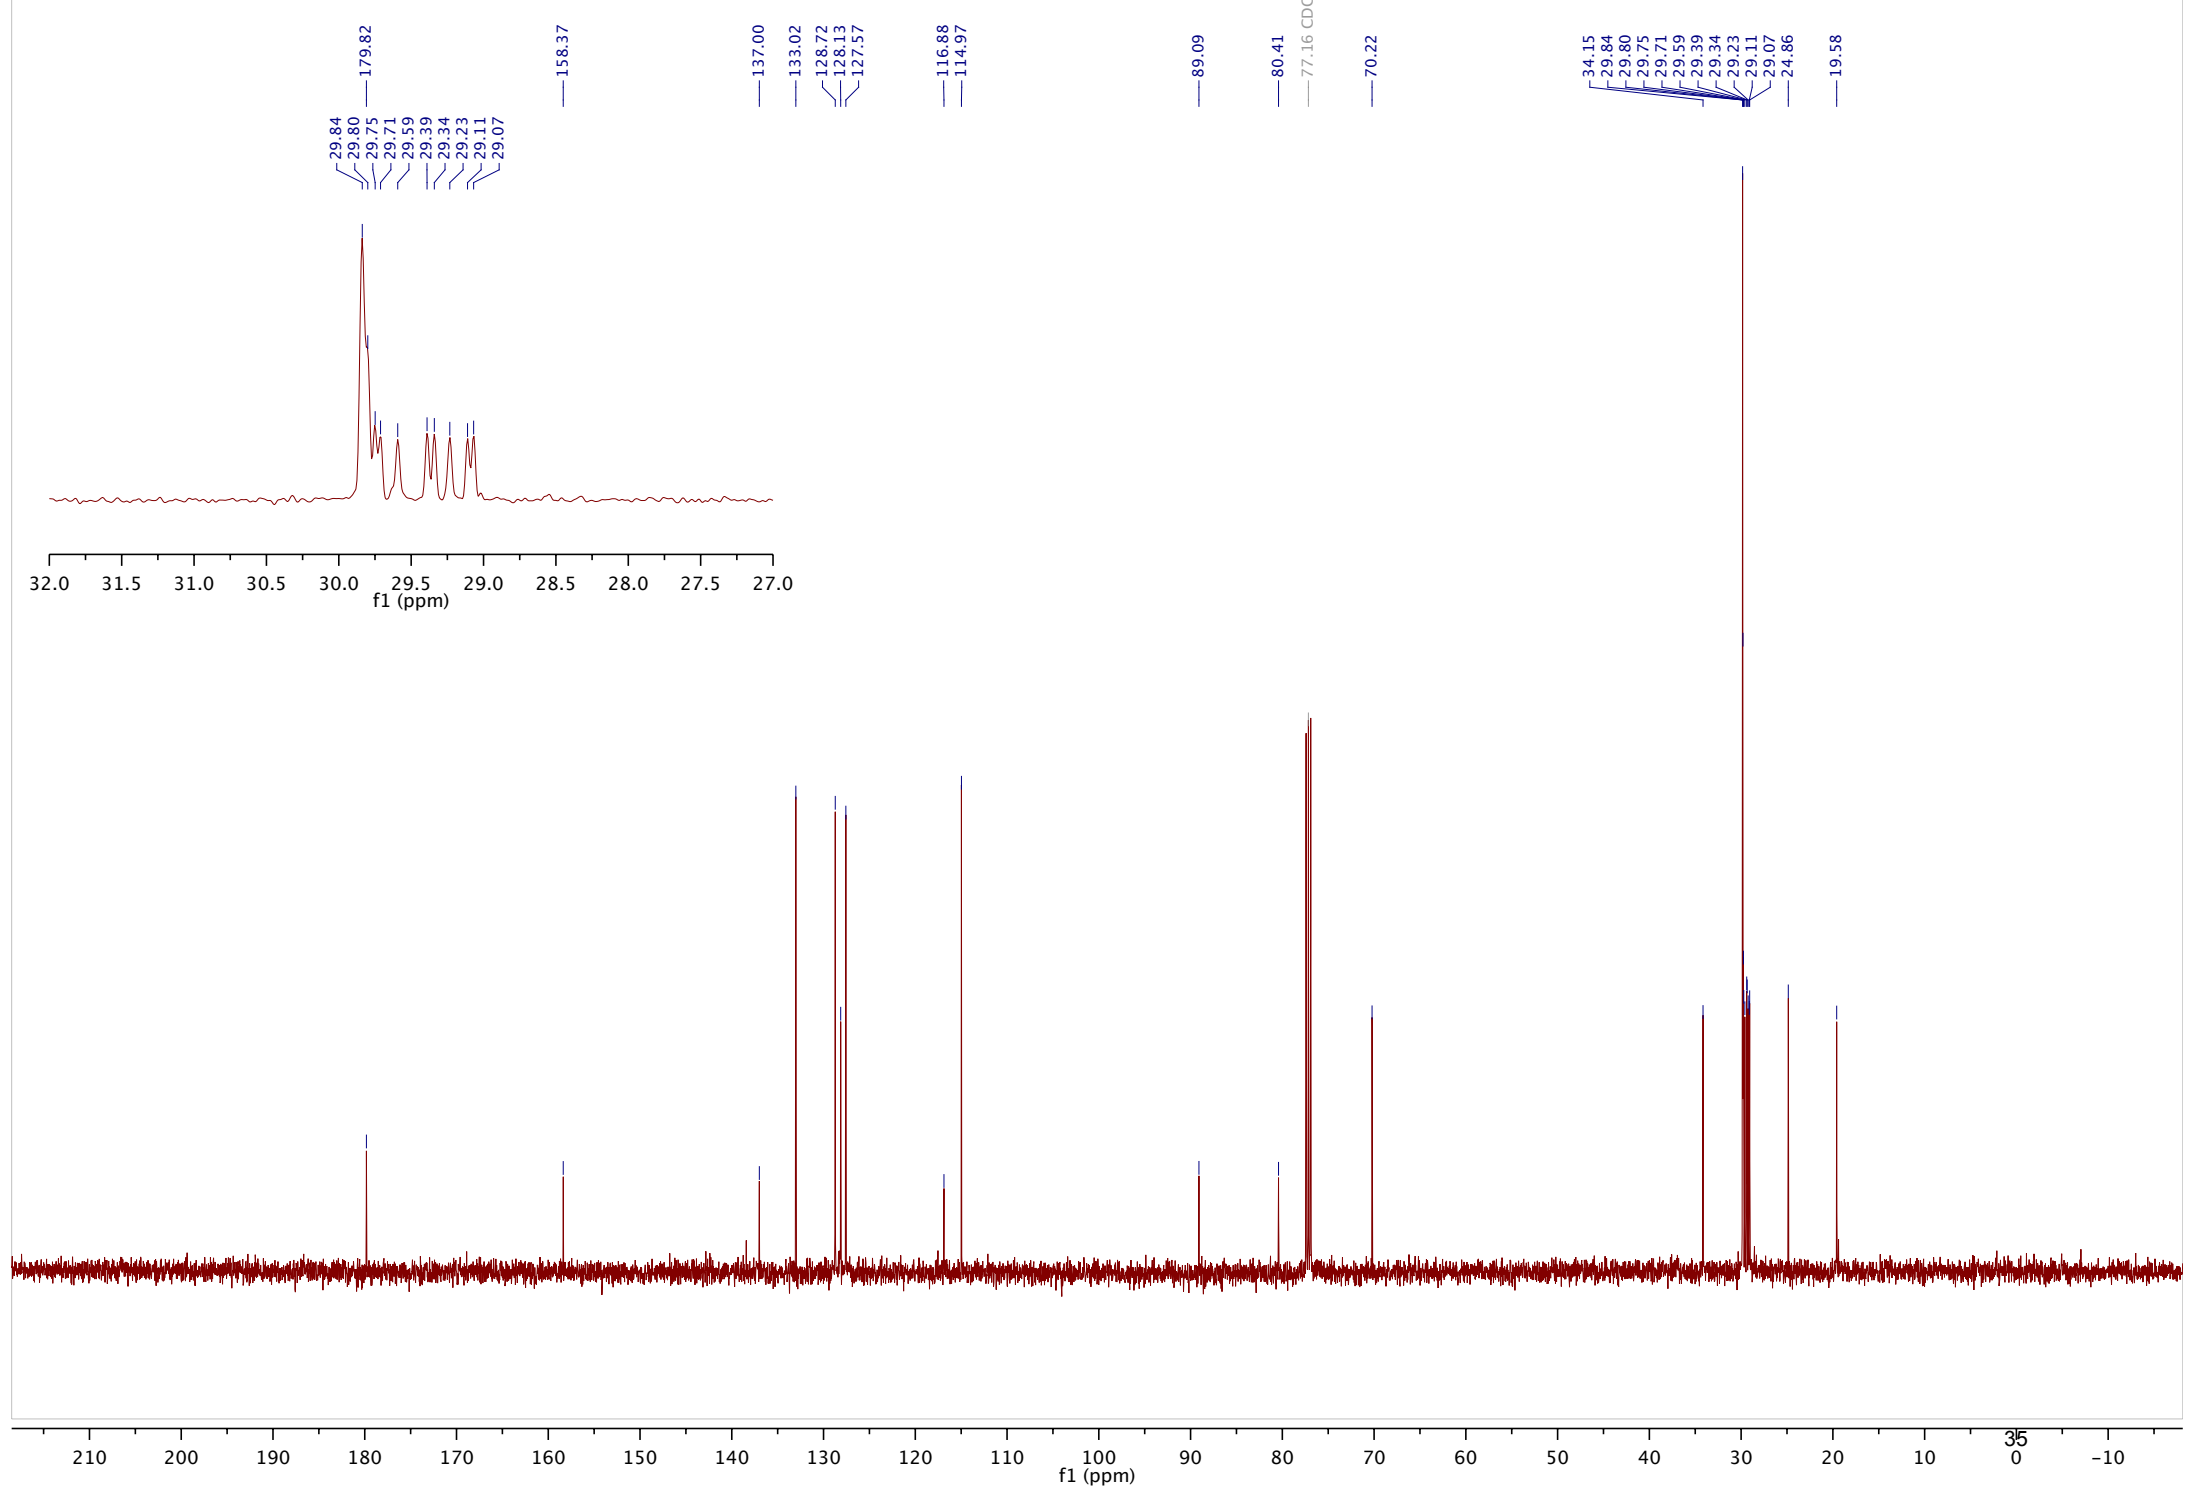

21-(4-hydroxyphenyl)henicosanoic acid

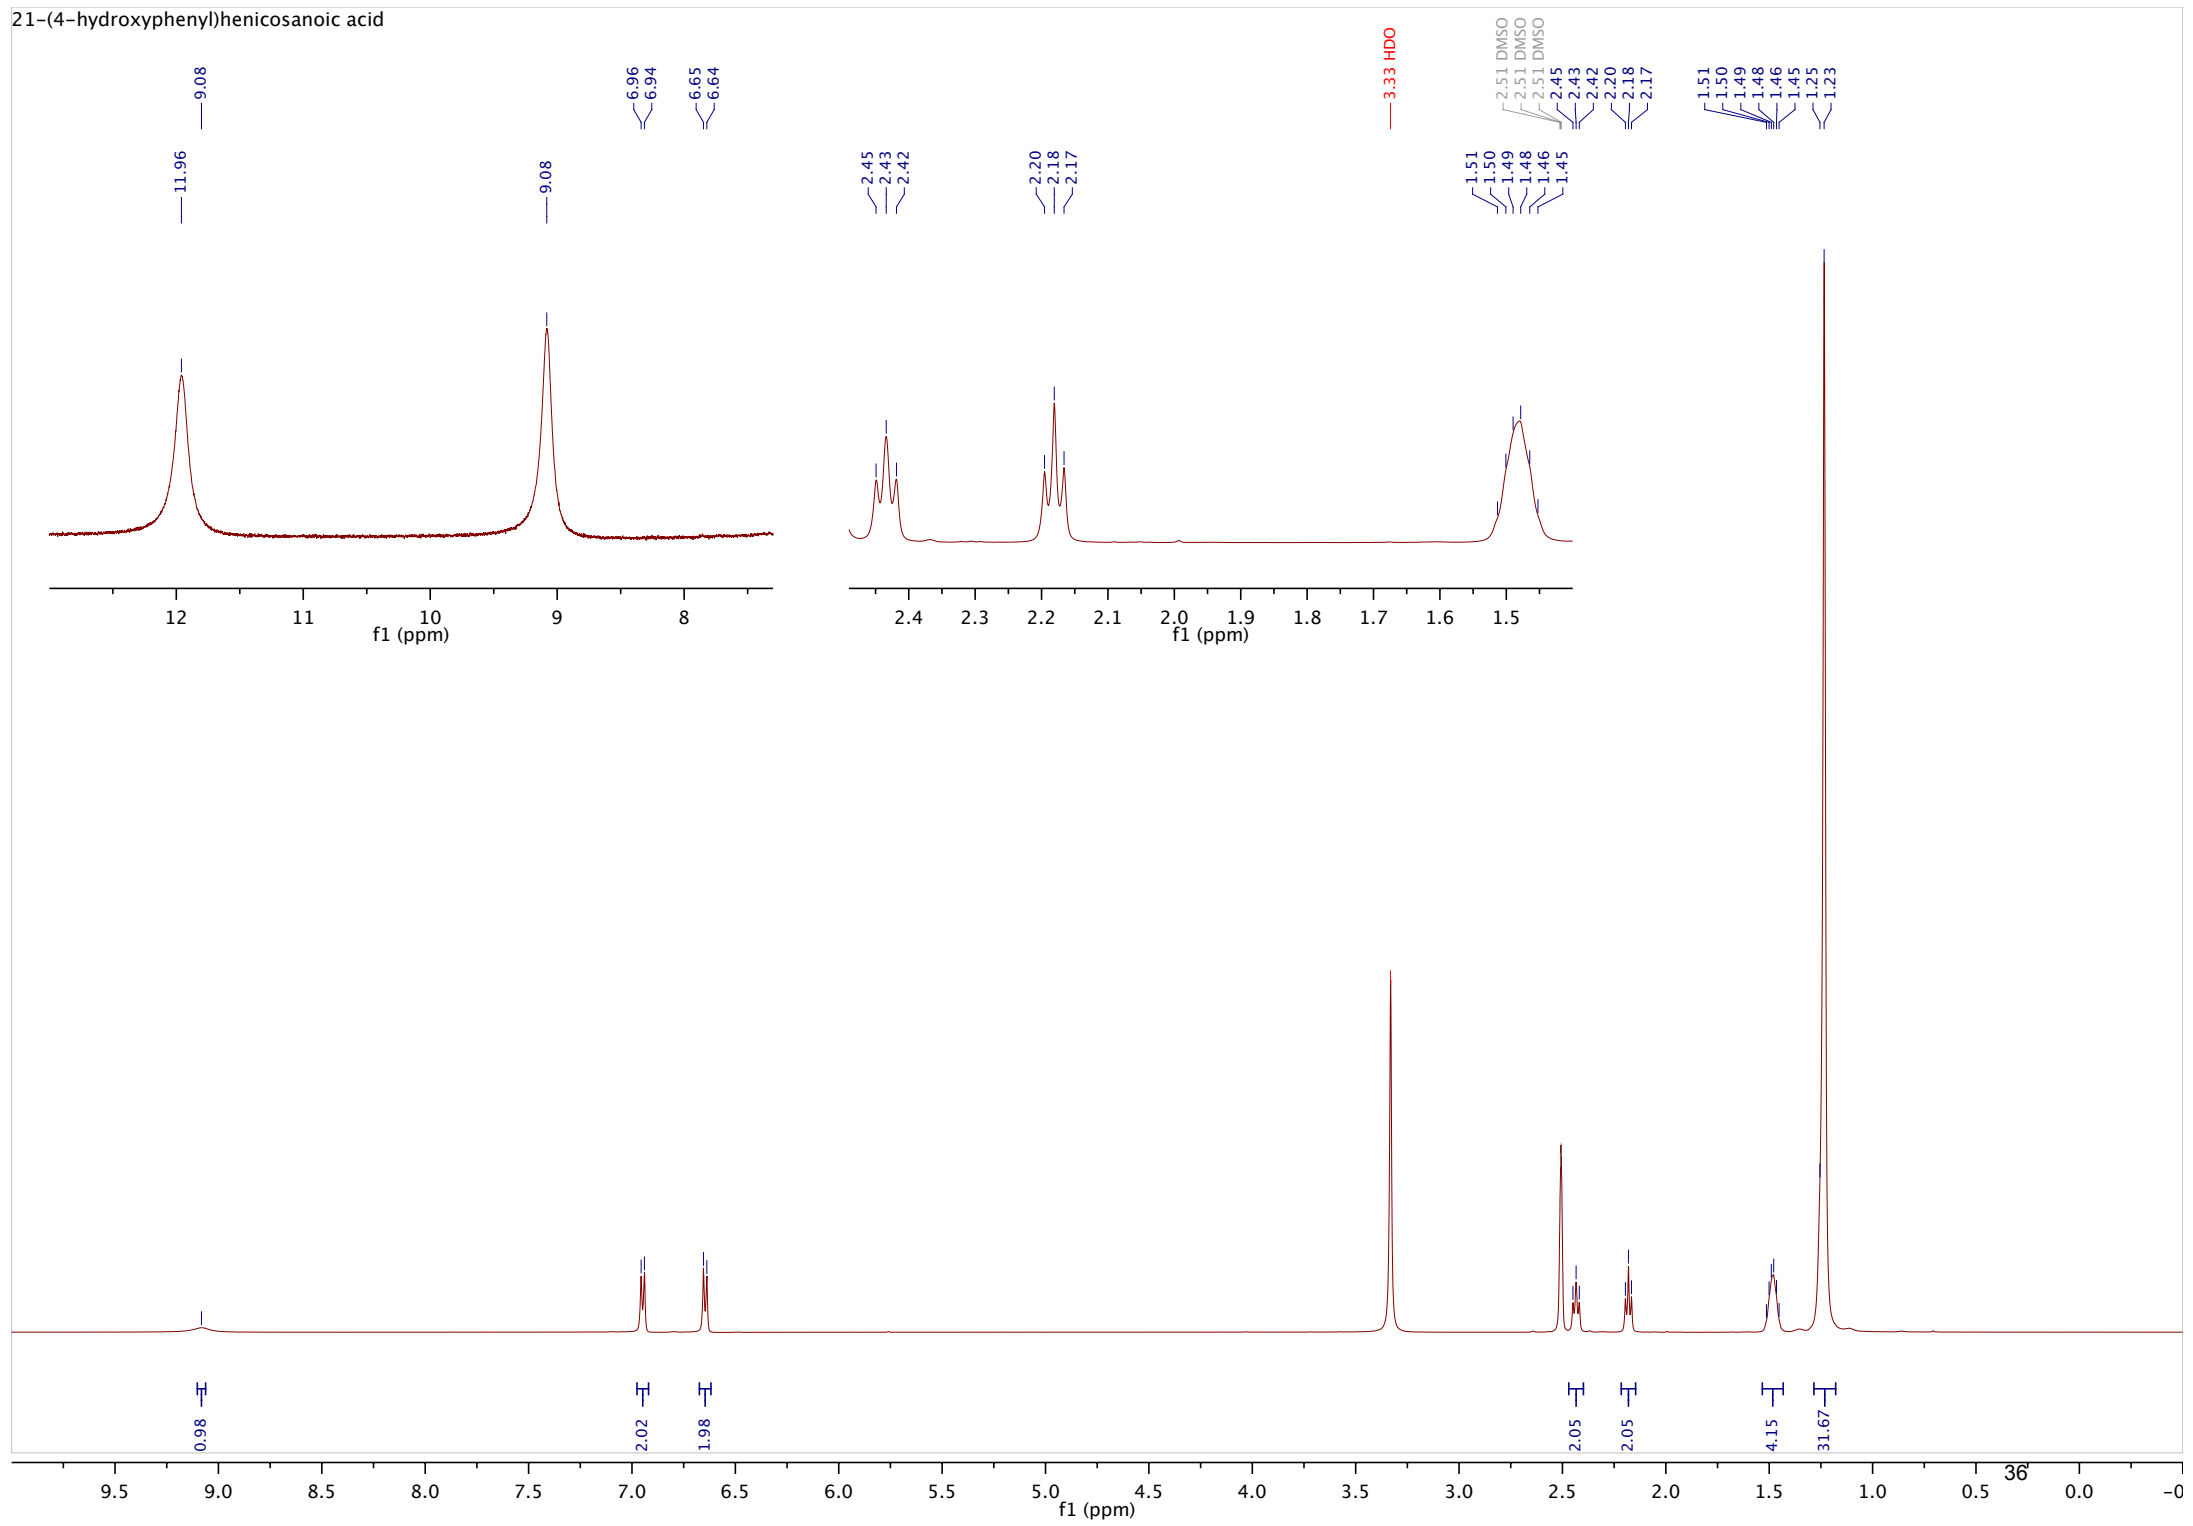

21-(4-hydroxyphenyl)henicosanoic acid

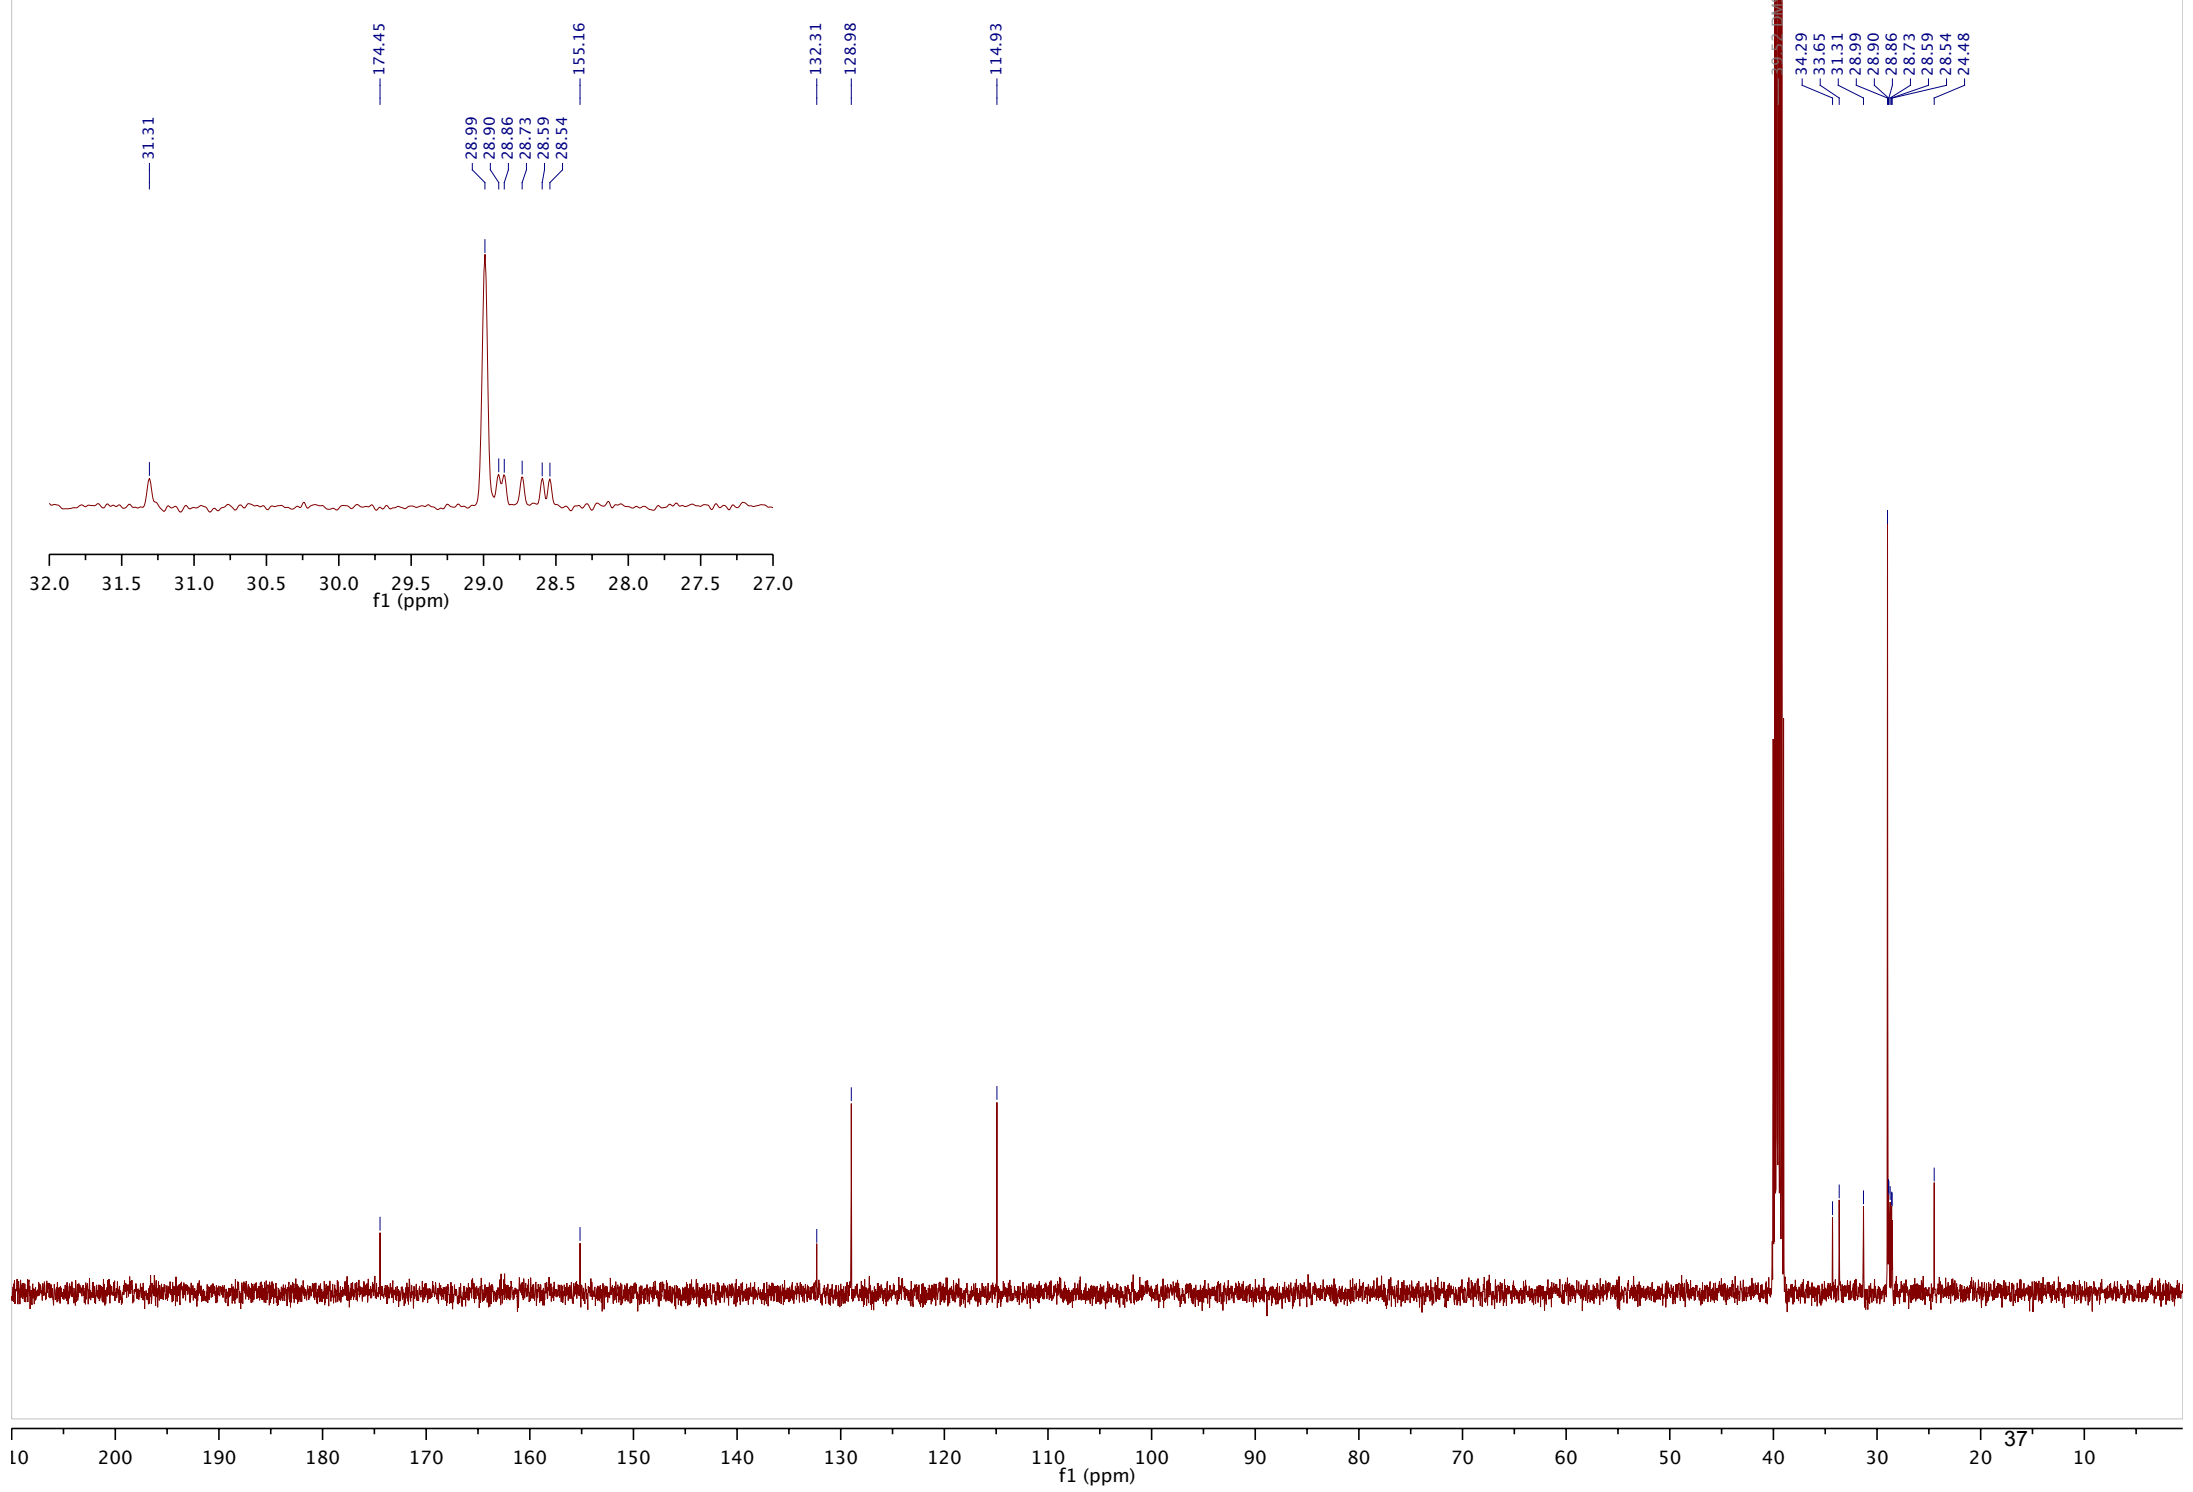

## REFERENCES

1. **Pfeifer BA, Admiraal SJ, Gramajo H, Cane DE, Khosla C.** 2001. Biosynthesis of complex polyketides in a metabolically engineered strain of *E. coli*. *Science* **291**:1790-1792.
2. **Quadri LEN, Weinreb PH, Lei M, Nakano MM, Zuber P, Walsh CT.** 1998. Characterization of Sfp, a *Bacillus subtilis* phosphopantetheinyl transferase for peptidyl carrier protein domains in peptide synthetases. *Biochemistry* **37**:1585-1595.
3. **Parish T, Stoker NG.** 2000. Use of a flexible cassette method to generate a double unmarked *Mycobacterium tuberculosis tlyA plcABC* mutant by gene replacement. *Microbiology* **146**:1969-1975.
4. **Chavadi SS, Edupuganti UR, Vergnolle O, Fatima I, Singh SM, Soll CE, Quadri LE.** 2011. Inactivation of *tesA* reduces cell wall lipid production and increases drug susceptibility in mycobacteria. *J. Biol. Chem.* **286**:24616-24625.
5. **Still WC, Kahn M, Mitra A.** 1978. Rapid chromatographic technique for preparative separations with moderate resolution. *J. Org. Chem.* **43**:2923-2925.
6. **Decker M, Fulton BS, Zhang B, Knapp BI, Bidlack JM, Neumeyer JL.** 2009. Univalent and bivalent ligands of butorphan: characteristics of the linking chain determine the affinity and potency of such opioid ligands. *J. Med. Chem.* **52**:7389-7396.
7. **Roth GJ, Liepold B, Müller SG, Bestmann HJ.** 2004. Further improvements of the synthesis of alkynes from aldehyde. *Synthesis*:59-62.
